# 1 High potency of sequential therapy with only $\beta$ -lactam antibiotics

2 Aditi Batra\*<sup>1,2</sup>, Roderich Roemhild\*<sup>1,2,3</sup>, Emilie Rousseau<sup>4</sup>, Soeren Franzenburg<sup>5</sup>, Stefan Niemann<sup>4</sup>,  
3 and Hinrich Schulenburg<sup>#,1,2</sup>

4

## 5 Affiliations

6 <sup>1</sup>Department of Evolutionary Ecology and Genetics, University of Kiel, Kiel, Germany

7 <sup>2</sup>Max Planck Institute for Evolutionary Biology, Ploen, Germany

8 <sup>3</sup>Institute of Science and Technology, Klosterneuburg, Austria

9 <sup>4</sup>Borstel Research Centre, National Reference Center for Mycobacteria, Borstel, Germany

10 <sup>5</sup>Competence Centre for Genomic Analysis Kiel, University of Kiel, Kiel, Germany

11

12 # Corresponding author contact: [hschulenburg@zoologie.uni-kiel.de](mailto:hschulenburg@zoologie.uni-kiel.de)

13 \* These authors contributed equally

14

## 15 ABSTRACT

16 Evolutionary adaptation is a major source of antibiotic resistance in bacterial pathogens. Evolution-  
17 informed therapy aims to constrain resistance by accounting for bacterial evolvability. Sequential  
18 treatments with antibiotics that target different bacterial processes were previously shown to limit  
19 adaptation through genetic resistance trade-offs and negative hysteresis. Treatment with  
20 homogeneous sets of antibiotics is generally viewed to be disadvantageous, as it should rapidly lead  
21 to cross-resistance. We here challenged this assumption by determining the evolutionary response of  
22 *Pseudomonas aeruginosa* to experimental sequential treatments involving both heterogenous and  
23 homogeneous antibiotic sets. To our surprise, we found that fast switching between only  $\beta$ -lactam  
24 antibiotics resulted in increased extinction of bacterial populations. We demonstrate that extinction  
25 is favored by low rates of spontaneous resistance emergence and low levels of spontaneous cross-  
26 resistance among the antibiotics in sequence. The uncovered principles may help to guide the  
27 optimized use of available antibiotics in highly potent, evolution-informed treatment designs.

28

## 29 INTRODUCTION

30 The efficacy of antibiotics for the treatment of infections is diminishing rapidly, as bacteria evolve  
31 new mechanisms to resist antibiotics (Laxminarayan et al., 2013). Resistance evolution is frequently  
32 observed during antibiotic therapy and can happen within days (Bloemberg et al., 2015; Hjort et al.,  
33 2020; Tueffers et al., 2019). A failure to account for such rapid bacterial adaptation is likely a  
34 common reason for treatment failure (Woods and Read, 2015; Zhou et al., 2020). For this reason, the  
35 field of evolutionary medicine specifically accounts for bacterial evolvability and seeks treatment  
36 solutions that are hard to overcome by genetic adaptation (Andersson et al., 2020; Merker et al.,  
37 2020). While an evolution-proof antibiotic remains to be found, the mechanisms that restrict  
38 evolutionary escape are starting to be revealed (Bell and MacLean, 2018). Such evolutionary insight  
39 may guide the design of effective and sustainable antibiotic therapy.

40 An effective way of reducing the amount of evolutionary solutions is to administer several antibiotics  
41 either simultaneously (i.e., combination therapy) or sequentially (i.e., sequential therapy). Tailored  
42 combination treatments make use of physiological and evolutionary constraints (Baym et al., 2016).  
43 The emergence of resistance is delayed by combinations, when evolutionary escape requires  
44 multiple mutations and when drug interactions eliminate the intermediate genetic steps of single-  
45 drug resistance (Chait et al., 2007), antibiotic tolerance (Levin-Reisman et al., 2017), and  
46 heteroresistance (Band et al., 2019). However, when genetic resistance to the combination is easily  
47 accessible, for example through gene amplification of efflux pumps, then combination therapy can  
48 accelerate resistance emergence (Pena-Miller et al., 2013). This undesired selective effect is  
49 potentially avoided by sequential drug application. Evolutionary escape from sequential treatments  
50 is constrained by negative hysteresis responses induced by specific antibiotics (Roemhild et al., 2018)  
51 and/or the emergence of genetic collateral sensitivity trade-offs (Barbosa et al., 2019; Yoshida et al.,  
52 2017). Negative hysteresis occurs when exposure to an antibiotic induces changes to bacterial  
53 physiology that transiently increase the killing efficacy of other antibiotics (Roemhild et al., 2018).  
54 Collateral sensitivity is a genetic side effect of evolved resistance that too increases the efficacy of  
55 other antibiotics (Szybalski and Bryson, 1952). Collateral sensitivity is prevalent among pathogens  
56 and occurs especially between antibiotics with distinct mechanism of action (i.e., heterogeneous sets  
57 of antibiotics), while cross-resistance often emerges towards antibiotics with similar mode of action  
58 (i.e., homogeneous sets of antibiotics) (Barbosa et al., 2017; Imamovic and Sommer, 2013; Lazar et  
59 al., 2014; Maltas and Wood, 2019). Thus, conventionally, multidrug treatments would avoid  
60 antibiotics from similar classes, with the rationale of limiting the overlap in the respective sets of  
61 resistance mutations, and thus the ensuing cross-resistance.

62 The particular efficacy of sequential therapy has been confirmed with the help of evolution  
63 experiments under controlled laboratory conditions. Different types of sequential treatments have  
64 been tested. Some regimens involved a single switch between antibiotics, while others included  
65 multiple switches at short time intervals. One of the main findings was that the efficacy of sequential  
66 treatments depended both on the included antibiotics and the particular treatment sequence  
67 (Fuentes-Hernandez et al., 2015; Maltas and Wood, 2019; Roemhild et al., 2015). While fast  
68 sequential treatments did not exclude the eventual emergence of multidrug resistance, many  
69 significantly delayed bacterial adaptation compared to monotherapy (Kim et al., 2014; Roemhild et  
70 al., 2015; Yoshida et al., 2017). A single antibiotic switch can also delay adaptation, dependent on the  
71 drug order, and it can additionally reverse previous resistance and resensitize bacterial populations  
72 to specific antibiotics (Barbosa et al., 2019; Hernando-Amado et al., 2020; Imamovic and Sommer,  
73 2013; Yen and Papin, 2017). Moreover, our group previously demonstrated that fast sequential  
74 treatments with a heterogeneous set of three antibiotics – the fluoroquinolone ciprofloxacin (CIP),  
75 the  $\beta$ -lactam carbenicillin (CAR), and the aminoglycoside gentamicin (GEN) – delayed the emergence  
76 of multidrug resistance in the pathogen *Pseudomonas aeruginosa* (Roemhild et al., 2018). The  
77 observed inhibition of evolutionary escape was manifested by the occurrence of population  
78 extinction, although antibiotic concentrations were below the minimal inhibitory concentration  
79 (MIC). We further found that negative hysteresis at antibiotic switches reduced adaptation rates  
80 because it selected for distinct genetic changes. Several populations adapted to fast-sequential  
81 treatment by independent mutations in the histidine kinase *cpxS* that only mildly increased  
82 resistance thereby explaining the low rate of adaptation to the used antibiotics. Instead the *cpxS*  
83 mutations suppressed negative hysteresis demonstrating that adaptation was specific to the  
84 selective constraint imposed by the drug switches. Based on these findings, we assumed that the  
85 acting selective dynamics were ultimately a consequence of antibiotic heterogeneity. However, is this  
86 so? Do selective dynamics differ for a homogenous set of drugs?

87 The primary aim of our current study was to assess the efficacy of sequential treatments with either  
88 heterogeneous or homogeneous sets of three antibiotics. We focused on *Pseudomonas aeruginosa*  
89 strain PA14 as a tractable pathogen model system, for which comprehensive experimental reference  
90 data is available on resistance evolution (e.g., Barbosa et al., 2019, 2018; Hernando-Amado et al.,  
91 2020; Roemhild et al., 2018; Sanz-García et al., 2018; Yen and Papin, 2017). We performed similar  
92 evolution experiments as before, with three new sets of bactericidal antibiotics, two of which  
93 included only  $\beta$ -lactams, and one the three previously considered modes of action (Figure 1,  
94 Supplementary File 1A). The new heterogeneous drug set CIP, streptomycin (STR), and doripenem  
95 (DOR) involved drug synergy and was expected to contribute to collateral sensitivity (Barbosa et al.,

96 2018, 2017). The drug sets comprising three  $\beta$ -lactams, however, had all properties that would  
97 typically be avoided for the design of multidrug treatments. The three  $\beta$ -lactams carbenicillin (CAR),  
98 cefsulodin (CEF), and doripenem (DOR) have the same core structure and individually inhibit the DD-  
99 transpeptidase activity in cell-wall synthesis (Walsh, 2003). The collateral effects landscape between  
100 CAR-CEF-DOR was expected to be dominated by cross-resistance (Barbosa et al., 2017) and the three  
101 antibiotics showed neither synergy nor antagonism (Barbosa et al., 2018). Resistance to these  
102 antibiotics may potentially be achieved through single mutations. The situation is replicated by the  
103 set of ticarcillin (TIC), azlocillin (AZL), and ceftazidime (CEZ). In contrast to expectations, the triple  $\beta$ -  
104 lactam sequences showed high treatment potency. Therefore, the secondary aim of our study was to  
105 assess which characteristics constrained the ability of the bacteria to adapt to the  $\beta$ -lactam  
106 sequential treatments. We focused on one triple  $\beta$ -lactam set (CAR-CEF-DOR) and specifically tested  
107 the influence of antibiotic switching rate, switching regularity, negative hysteresis, the potential for  
108 spontaneous resistance evolution, and resulting cross-resistances on treatment efficacy.

109

## 110 RESULTS

### 111 Triple $\beta$ -lactam sequential treatments favor extinction of bacterial populations

112 We challenged a total of 756 replicate *P. aeruginosa* populations with sequential treatments across  
113 three fully independent evolution experiments, each focused on a different set of three antibiotics  
114 (Figure 1, Figure 1-figure supplement 1, Supplementary File 1A, Material and methods). The  
115 antibiotic concentrations were calibrated to an inhibitory concentration of 75% (IC75), allowing  
116 bacteria to adapt to the imposed selection pressure. We used a serial dilution protocol for  
117 experimental evolution, with 2% culture transfer after 12 h (one transfer) across a total of 96  
118 transfers, equivalent to approximately 500 bacterial generations. Following the previous setup  
119 (Roemhild et al., 2018), we recorded the evolutionary dynamics in response to 16 different  
120 treatments, belonging to four main treatment types: monotherapy, fast-regular, slow-regular and  
121 random sequential therapy (Figure 1).

122 Extinction of experimental populations differed considerably between the antibiotic sets. The two  $\beta$ -  
123 lactam sets produced a surprisingly high degree of extinction (CAR-CEF-DOR and TIC-AZL-CEZ; extinct  
124 fraction 27.2% and 13.3% respectively, Figure 1C). The observed extinction frequency was  
125 comparable to that observed in the previous experiment with CAR-CIP-GEN (extinct fraction 15%,  
126 Figure 1C). CIP-DOR-STR caused no extinction, indicating that extinction was not explained by  
127 applying heterogeneous sets of antibiotics. Within the  $\beta$ -lactam sequential treatments we observed  
128 that treatments which switched between antibiotics fast (every transfer) produced much higher  
129 extinction levels than those which switched slowly (every four transfers) or not at all (Figure 1D).  
130 Most of the extinction events happened early in the experiment (Figure 1E), indicating that the initial  
131 treatment steps are critical for adaptation of populations. We conclude that fast sequential  $\beta$ -lactam  
132 treatments showed a surprising ability to restrict bacterial adaptation. As this result was unexpected,  
133 we decided to research the mechanisms that constrain resistance emergence in  $\beta$ -lactam sequences.  
134 Given that the experiment involving CAR-CEF-DOR produced the highest fraction of extinct  
135 populations, we decided to focus further analyses on this set.

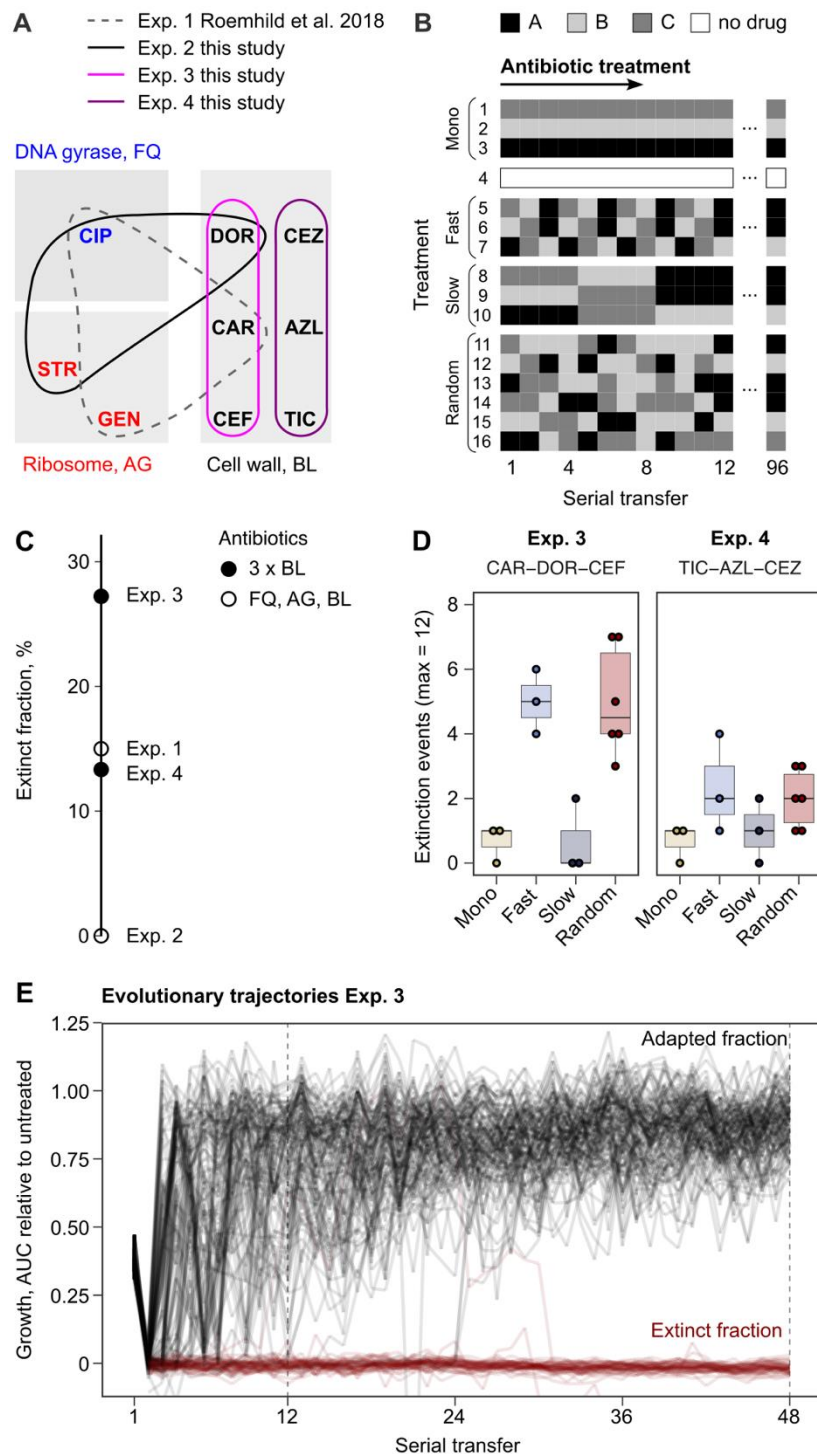

136

137 **Figure 1. Probability of evolutionary rescue depends on drug triplets and treatment type.** (A) The  
 138 evaluated antibiotic combinations comprise different types of antibiotic targets. Fluoroquinolone  
 139 antibiotics (FQ) target DNA gyrase, aminoglycosides (AG) inhibit translation, and  $\beta$ -lactams (BL)  
 140 inhibit cell-wall synthesis. (B) The evaluated treatment protocols test the effects of switching rate,  
 141 and temporal regularity. (C) A fraction of lineages is eradicated by the sub-lethal dosage sequential  
 142 treatments. Lineage extinction is high for combinations of cell-wall targeting  $\beta$ -lactams. (D) Variation  
 143 in extinction for the  $\beta$ -lactam combinations by treatment type ( $n=3-6$  protocols per treatment type).  
 144 (E) The distribution of evolutionary trajectories for Exp. 3 with CAR-DOR-CEF shows that the majority  
 145 of extinction events occur within the first 12 serial transfers ( $n=180$  lineages). Growth of evolving  
 146 lineages is quantified relative to untreated reference populations using the relative area under the

147 growth curve (AUC). AZL: azlocillin, CAR: carbenicillin, CEF: cefsulodin, CEZ: ceftazidime, CIP:  
148 ciprofloxacin, DOR: doripenem, GEN: gentamicin, STR: streptomycin, TIC: ticarcillin. The following  
149 supplementary material is available for Figure 1: Figure 1-figure supplement 1, Figure 1-source data  
150 1, Figure 1-figure supplement 1-Source data 1, Supplementary File 1A.

151

152 **Resistance to doripenem was constrained in both monotherapy and switching treatments in the**  
153 **CAR-CEF-DOR triple  $\beta$ -lactam experiment**

154 The CAR-CEF-DOR triple  $\beta$ -lactam experiment was characterized in detail for changes in growth,  
155 evolved resistance, and whole genome sequences, in order to assess the selection dynamics  
156 involved. We calculated the relative growth yield (see methods) at the end of each transfer and  
157 found growth dynamics to be divided into three phases: an early phase of rapid adaptation (transfers  
158 1-12), followed by a phase of gradual growth yield convergence (transfers 13-48), and a final plateau  
159 phase (transfers 49-96) (Figure 2A; the growth phases are separated by vertical dotted lines). We  
160 compared the main treatment types using general linear models (GLM) for each phase separately  
161 (this fulfils the model assumption of response linearity). The early phase dynamics were  
162 characterized by significantly decelerated adaptation dynamics of the fast-regular group compared  
163 with monotherapy and slow-regular (GLM, posthoc test,  $p < 0.037$ , Supplementary File 1B), but not  
164 random treatments. The slow-regular treatment did not differ significantly from monotherapy or  
165 random treatments (GLM, posthoc test,  $p = 0.469$ , Supplementary File 1B). In the subsequent phase,  
166 growth yields of the groups converged to a plateau of roughly 90% relative yield, indicating similar  
167 final levels of adaptation (the growth yields of main treatment groups showed no statistical  
168 differences in phases 2 and 3, Supplementary File 1B). Alternating between the  $\beta$ -lactams fast and in  
169 a regular order therefore significantly constrained the growth of the bacterial populations.  
170 Intriguingly, in these fast sequential treatments, bacterial growth in the transfers with DOR was  
171 lower than in the transfers with the other two antibiotics (Figure 2-figure supplement 1), indicating  
172 an evolutionary constraint associated with the antibiotic DOR. We can rule out the alternative  
173 hypotheses that the reduced growth is explained by a stronger initial reduction in bacterial  
174 population size by DOR in comparison to the other two drugs, or increased stochastic variation in  
175 dosage effects. All treatments were initiated using specifically standardized IC75 dosage (see  
176 methods) and at the IC75, DOR showed very little variation (Figure 1-figure supplement 1). We thus  
177 hypothesise that the observed evolutionary constraint may be due to lower rate of DOR resistance  
178 emergence.

179



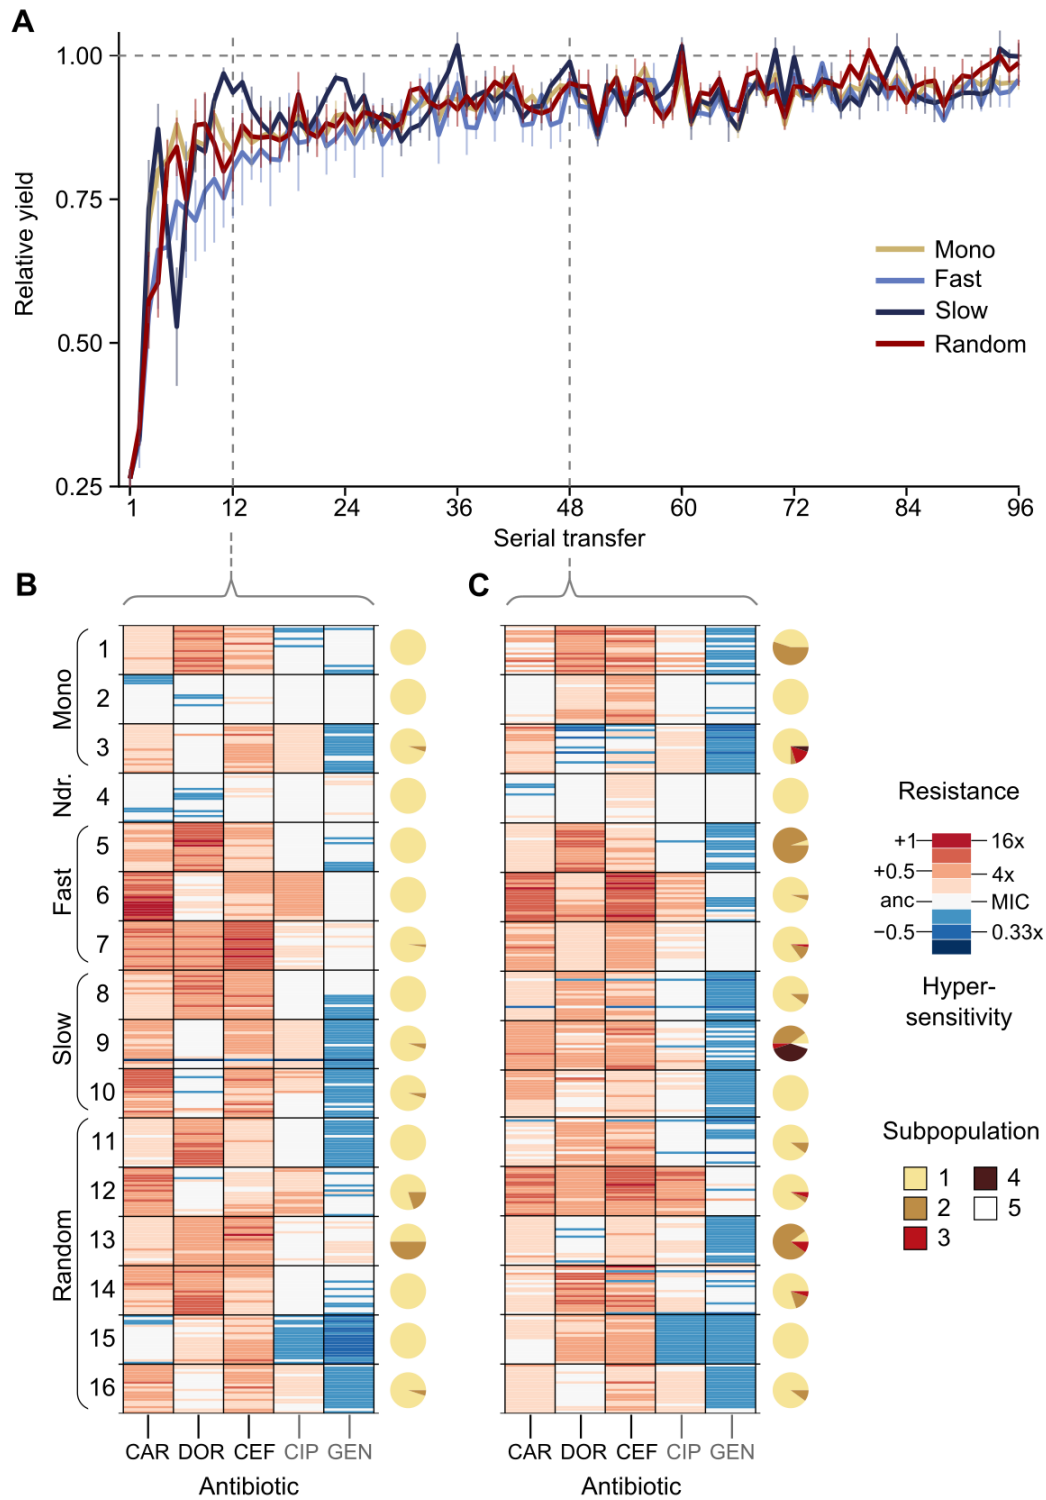

180

181 **Figure 2. Resistance to doripenem is constrained in the CAR-CEF-DOR triple  $\beta$ -lactam experiment.**  
 182 **(A)** Rapid adaptive increase of biomass yields relative to the untreated reference populations (mean  
 183  $\pm$  CI95;  $n=3-6$  protocols per treatment type and 12 biological replicates per sequence; extinct lineages  
 184 excluded). Vertical dotted lines separate the three growth phases. Evolved changes in the  
 185 susceptibility to the treatment antibiotics CAR, DOR, and CEF and the non-treatment antibiotics CIP  
 186 and GEN after transfer 12 **(B)** or transfer 48 **(C)**, evaluated with 20 isolates each for the 16  
 187 representative adapting populations at each time point. Mono 1 is monotherapy with CAR, mono 2 is  
 188 monotherapy with DOR, and mono 3 is monotherapy with CEF. The evolution of resistance and



189 hypersensitivity are indicated by red and blue colour, respectively, given for the considered isolates  
190 as horizontal lines (total of 640 isolates), sorted according to evolution treatment (main rows in the  
191 figures) and tested antibiotics (main columns; antibiotics given at the bottom). Pie charts on the right  
192 show phenotypic within-population diversity, where different colours indicate subpopulations  
193 inferred from hierarchical clustering of resistance phenotypes. The following supplementary material  
194 is available for Figure 2: Figure 2-figure supplement 1, Figure 2-Figure Supplement 2, Figure 2-figure  
195 supplement 3, Figure 2-figure supplement 4, Figure 2-figure supplement 5, Figure 2-source data 1,  
196 Figure 2-figure supplement 1-source data 1, Figure 2-figure supplement 2-source data 1, Figure 2-  
197 figure supplement 3-source data 1, Figure 2-figure supplement 5-source data 1, Supplementary File  
198 1B-1F.

199

200 To understand the dynamics of early adaptation in more detail, we measured the resistance profiles  
201 of 16 evolved populations after transfers 12 and 48 from the different antibiotic treatments  
202 (representing the end of phases one and two, respectively; Figure 2B and C, Figure 2-figure  
203 supplement 2-5, Supplementary File 1B-1F see methods). We randomly sampled 20 bacterial  
204 colonies from each population and characterized their resistance profile by broth microdilution.  
205 Resistance was measured for the three antibiotics of the evolution experiment and two additional  
206 clinically relevant antibiotics from different classes, ciprofloxacin and gentamicin. The resistance  
207 profiles in the early and the mid phases were found to be distinctly different. Resistance to the used  
208  $\beta$ -lactams increased across the two time points only in some treatments, but not all (Figure 2B and  
209 2C, Figure 2-figure supplement 4, Figure 2-figure supplement 5, Supplementary File 1F), suggesting  
210 treatment-dependent evolutionary responses to the antibiotics. We assessed how the main  
211 treatment types varied in their  $\beta$ -lactam resistance using a GLM for each phase separately. Most  
212 treatment types varied significantly from each other in their multidrug  $\beta$ -lactam resistance in both  
213 phases (Supplementary File 1C and 1D). The multidrug resistance in the early phase was in most  
214 cases constrained by the susceptibility to DOR (e.g., in the switching and monotherapy treatments).  
215 We additionally observed collateral responses of the treatment to the two non- $\beta$ -lactams, which  
216 increased over time. We further used hierarchical clustering of the resistance profiles to assess the  
217 presence of subpopulations, followed by calculation of Shannon diversity for each population at both  
218 transfers. We found population diversity to be significantly higher at transfer 48 as compared to  
219 transfer 12 (ANOVA,  $F = 6.2060$ ,  $p = 0.01893$ , Supplementary File 1E), indicating a diversification of  
220 the evolving lineages over time. Taken together, the population analysis of resistance profiles  
221 indicates that resistance evolution depends on the exact treatment protocol and that the dynamics  
222 of resistance emergence to DOR may be key for the observed deceleration of  $\beta$ -lactam adaptation in  
223 the fast-regular treatments.

224 To identify the genomic changes underlying the first steps of  $\beta$ -lactam adaptation we sequenced 33  
225 whole genomes of the evolved and characterized isolates from the monotherapy, fast-regular, and  
226 slow-regular treatment types. Specifically, we sequenced three isolates from each population  
227 representing the distinct phenotypic subpopulations, assessed above. We found that all isolates,  
228 except those which received DOR monotherapy, had mutations in known resistance genes by the end  
229 of the early phase (Table 1). This agreed with the inferred resistance profiles where isolates from the  
230 DOR monotherapy did not show a noticeable amount of resistance at that stage (Figure 2B). DOR  
231 resistance was, however, found at the end of the middle phase (Figure 2C) and this was mirrored in  
232 the genomics with a non-synonymous mutation in the gene *ftsI*. This gene codes for the penicillin  
233 binding protein 3 (PBP3) (Liao and Hancock, 1995), a common target of the three  $\beta$ -lactams (Davies  
234 et al., 2008; Fontana et al., 2000; Rodríguez-Tebár et al., 1982; Rodríguez-Tebar et al., 1982;  
235 Zimmermann, 1980). *ftsI* was also found to be mutated in isolates from CAR monotherapy, although  
236 at a different site within the gene and associated with a different resistance profile than the DOR-  
237 associated *ftsI* variant (Figure 2B). Isolates from CEF monotherapy contained mutations in *pepA*. This  
238 gene is responsible for the production of a protein required for cytotoxicity and virulence in *P.*  
239 *aeruginosa* (Hauser et al., 1998). Although its role in antimicrobial resistance remains to be studied in  
240 detail, it was found to be mutated in *P. aeruginosa* strains resistant to certain  $\beta$ -lactams (Cabot et al.,  
241 2018; Sanz-García et al., 2018). The switching treatments selected for mutations in the above-listed  
242 and also in some additional genes. In particular, we identified mutations in *nalD* and *phoQ*, a  
243 negative regulator of the MexAB-OprM efflux pump and a two-component system, respectively.  
244 Mutations in these genes account for resistance to a variety of drugs in *P. aeruginosa* (Barbosa et al.,  
245 2021; Sobel et al., 2005). Further mutations were identified in some non-canonical  $\beta$ -lactam  
246 resistance genes such as *rmcA*, 23srRNA, 3-oxoacyl synthase, *dnaX* and *zipA* (Table 1). Taken  
247 together, mutations in both canonical and non-canonical targets of  $\beta$ -lactam selection were  
248 identified in our experiment, and among these, DOR resistance mutations were found only later in  
249 the experiment, consistent with the obtained resistance profiles (Figure 2B and 2C).

250 Based on our detailed characterization of the CAR-CEF-DOR triple  $\beta$ -lactam experiment, we conclude  
251 that DOR has a key role in restricting evolutionary rescue as evidenced by the delayed acquisition of  
252 genetic resistance to it.

253 **Table 1. Evolved genetic changes inferred from whole genome sequencing.**

| Treatment type | ID <sup>a</sup> | AA change <sup>b</sup> | Gene name     | Annotation                                | Freq <sup>c</sup> |
|----------------|-----------------|------------------------|---------------|-------------------------------------------|-------------------|
| Monotherapy    | 1               | V471G                  | <i>ftsI</i>   | Peptidoglycan synthesis                   | 3/3               |
|                | 2 <sup>d</sup>  | N242S                  | <i>ftsI</i>   | Peptidoglycan synthesis                   | 3/3               |
|                | 3               | T157P                  | <i>pepA</i>   | Virulence                                 | 3/3               |
| Fast Regular   | 5               | V471G                  | <i>ftsI</i>   | Peptidoglycan synthesis                   | 3/3               |
|                | 6               | K26                    | <i>nalD</i>   | Efflux                                    | 3/3               |
|                |                 | S379ISR                | <i>rmcA</i>   | Biofilm maintenance                       | 1/3               |
|                | 7               | R220C                  | <i>phoQ</i>   | Two-component                             | 3/3               |
|                |                 | -                      | PA14_55631    | 23srRNA, Translation                      | 1/3               |
| Slow Regular   | 8               | V471G                  | <i>ftsI</i>   | Peptidoglycan synthesis                   | 3/3               |
|                | 9               | D357N                  | <i>pepA</i>   | Virulence                                 | 3/3               |
|                | 10              | T157P                  | <i>pepA</i>   | Virulence                                 | 3/3               |
|                |                 | E115VAAWIPK            | PA14_21540    | Lipid metabolism (3-exoacyl ACP synthase) | 1/3               |
|                |                 | Q117AEEQ               | PA14_21540    | Lipid metabolism (3-exoacyl ACP synthase) | 1/3               |
|                |                 | R178C                  | <i>zipA</i>   | Cell division                             | 2/3               |
|                | P483PEP         | <i>dnaX</i>            | Cell division | 1/3                                       |                   |

254 <sup>a</sup> Individual treatment of evolution experiment

255 <sup>b</sup> Amino acid change

256 <sup>c</sup> Occurrence frequency of the identified variant (before slash) out of the total number of isolates sequenced  
257 (behind slash)

258 <sup>d</sup> Mutations listed are from isolates obtained from the populations frozen at transfer 48, no variants were  
259 found in the isolates from transfer 12.

260 The following supplementary material is available for Table 1: Table 1-source data 1.

261

## 262 **Asymmetric bidirectional hysteresis was identified between doripenem and carbenicillin**

263 As extinction was associated with antibiotic switches, we next focused on selective events that can  
264 occur at drug switches, such as hysteresis, an inducible physiological change. We characterized the  
265 complete hysteresis landscape between the three  $\beta$ -lactams: CAR, DOR, and CEF. We pretreated  
266 exponential phase cells with an antibiotic for only 15 min, to ensure that cells are physiologically  
267 challenged but not subject to differential killing or replication. The pretreatment was followed by a  
268 change to fresh medium containing a second antibiotic as main treatment. We included controls of  
269 no pretreatment, or no main treatment (Figure 3A). We found that negative hysteresis existed for

270 several switches between the  $\beta$ -lactams (Figures 3B and 3C, Figure 3-figure supplement 1, Figure 3-  
271 figure supplement 2). DOR and CAR displayed asymmetric bidirectional negative hysteresis with the  
272 switch from DOR to CAR resulting in stronger negative hysteresis than the reverse. Negative  
273 hysteresis was also observed in the switch from CAR to CEF and CEF to CEF. To our surprise, only a  
274 single case of weak positive hysteresis was observed, although we generally anticipated it given that  
275 *P. aeruginosa* produces the AmpC  $\beta$ -lactamase (Livermore, 1995). We conclude that negative  
276 hysteresis is abundant between the studied  $\beta$ -lactams and is a potential predictor of treatment  
277 potency in the sequential  $\beta$ -lactam treatments.

278

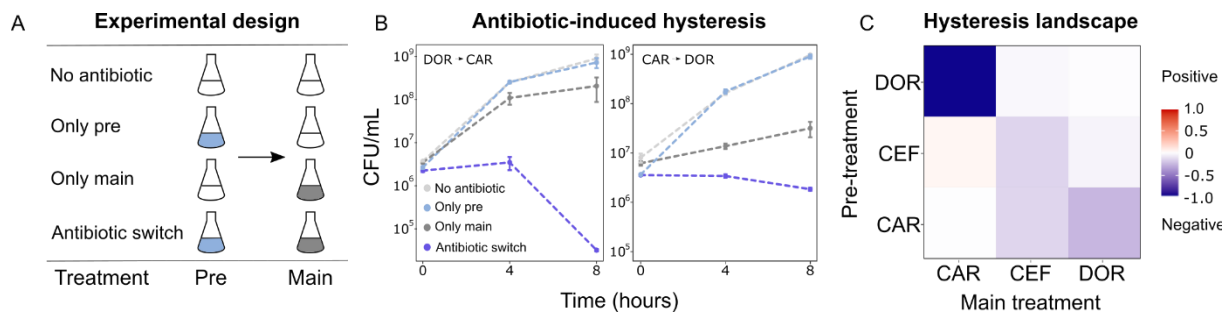

279

280 **Figure 3. Negative hysteresis is common among the tested  $\beta$ -lactam antibiotics.** (A) Hysteresis  
281 effects were measured using the previously established experimental approach (see methods). (B)  
282 Bacterial counts were plotted over time after the pretreatment to obtain time-kill curves (mean  $\pm$   
283 sem, n=3). Level of hysteresis was quantified as the difference between the antibiotic switch and the  
284 only main curves. Negative values indicate negative hysteresis and positive values indicate positive  
285 hysteresis (C) Heatmap of hysteresis levels between all 9 combinations of the three  $\beta$ -lactams. DOR  
286 and CAR show asymmetric bidirectional negative hysteresis. Negative hysteresis is also observed in  
287 switches from CEF to CEF and CAR to CEF. Weak positive hysteresis is found for the switch from CEF  
288 to CAR. The following supplementary material is available for Figure 3: Figure 3-figure supplement 1,  
289 Figure 3-figure supplement 2, Figure 3-source data 1, Figure 3-figure supplement 1-source data 1.

290

### 291 Probability of direct and indirect resistance was the least for doripenem

292 Since resistance to DOR was constrained in both the monotherapy and the switching treatments  
293 (Figure 2B), we hypothesized that DOR resistance was difficult to achieve compared to the other two  
294  $\beta$ -lactams. Resistance against a given drug can arise because of spontaneous direct resistance and/or  
295 because of collateral resistance from the preceding antibiotics in the sequence. As a first step, we  
296 thus measured the spontaneous direct resistance rate with the classic fluctuation assay, using  
297 identical inhibitory concentrations of the three antibiotics (Luria and Delbrück, 1943, Figure 4A,

298 Supplementary File 1G). To determine the probability of indirect resistance in a second step, we  
299 isolated the obtained single-step mutants and quantified the fraction of cross-resistance towards the  
300 other two  $\beta$ -lactams with a patching assay (Figure 4A). We used a comparatively large number of  
301 spontaneous mutants for this analysis ( $n = 60$  per antibiotic) to capture the stochastic nature of  
302 evolution and, in this context, the potential importance of collateral effects for bacterial adaptation,  
303 as previously emphasized (Nichol et al., 2019). We found that the spontaneous resistance rate was  
304 significantly lower for DOR than for CAR and CEF (Likelihood ratio test,  $p < 0.0001$  and  $p < 0.01$ ,  
305 respectively; Supplementary File 1H, Figure 4B). Moreover, the resulting cross-resistance effects  
306 (Figure 4C) were particularly common towards CAR (93% of clones with spontaneous CEF resistance  
307 and 71% with DOR resistance) and CEF (73% of originally CAR-resistant clones and 67% DOR-resistant  
308 clones). By contrast, the smallest levels of cross-resistance were expressed towards DOR (36% of  
309 originally CAR-resistant clones and 50% CEF-resistant clones). The overall fraction of cross-resistant  
310 clones was significantly smaller towards DOR than either CEF or CAR (Fisher exact test,  $p < 0.0004$ ;  
311 Supplementary File 1I). We conclude that of the three  $\beta$ -lactams, DOR had the lowest probability for  
312 both direct and indirect resistance, thereby providing experimental support to the indication of  
313 constrained DOR resistance evolution obtained from the detailed phenotypic and genomic  
314 characterization of the evolved bacteria (Figure 2, Table 1).

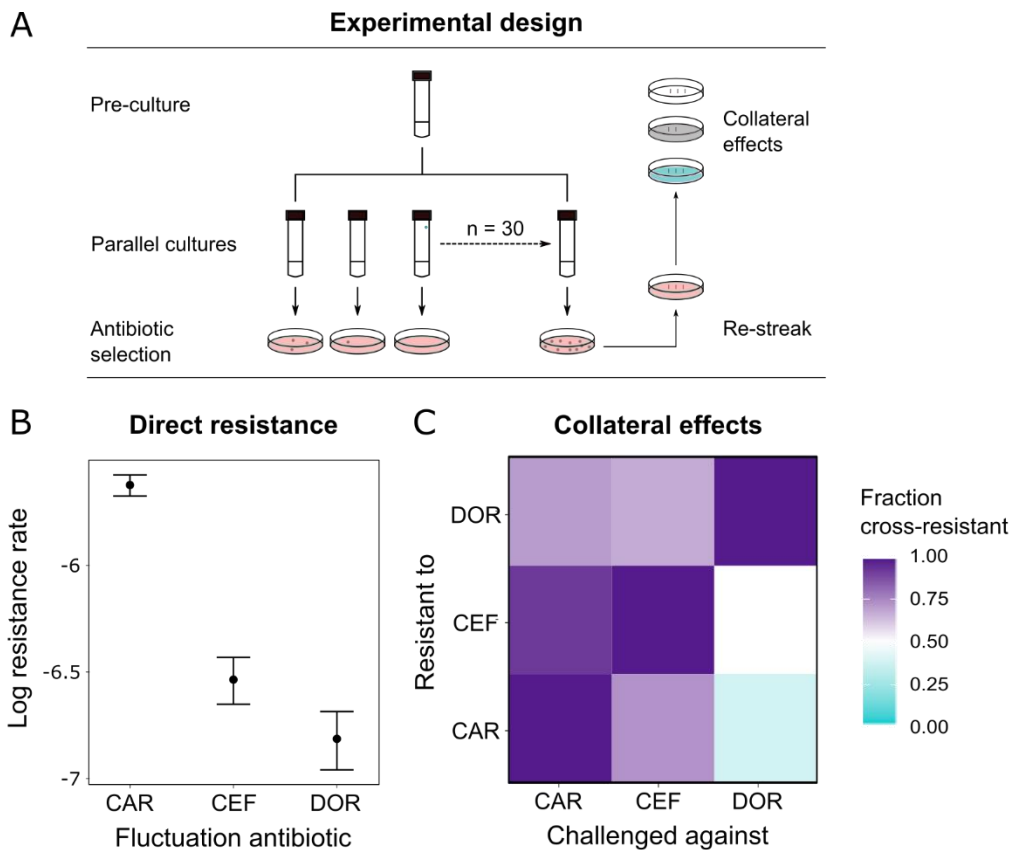

315

316 **Figure 4. Doripenem has the lowest rates of direct and indirect resistance.** (A) Schematic of the  
 317 experimental protocol to determine spontaneous rates of resistance on each of the three  $\beta$ -lactams  
 318 and the resulting collateral landscape. Briefly, an overnight culture was taken and split into 30  
 319 parallel cultures where bacteria were allowed to divide in the absence of an antibiotic and any other  
 320 constraint. Spontaneous resistant mutants were selected on MIC plates and restreaked to ensure  
 321 genetic resistance. These mutants were then patched on MIC plates of the other two  $\beta$ -lactams to  
 322 test for cross-resistance. (B) Comparison of rates of spontaneous resistance on the three  $\beta$ -lactams,  
 323 on a Log<sub>10</sub> scale. Error bars depict CI95. All comparisons were found to be significantly different from  
 324 each other (Likelihood Ratio Test; CAR vs CEF  $p < 0.0001$ , CAR vs DOR  $p < 0.0001$  and DOR vs CEF  
 325  $p < 0.01$ ). (C) Landscape of collateral effects between the three  $\beta$ -lactams. Fraction of cross-resistant  
 326 mutants per antibiotic combination is plotted. DOR has the least cases of cross-resistance of the  
 327 three. A total of 60 mutants per antibiotic were used for collateral effect testing. The following  
 328 supplementary material is available for Figure 4: Figure 4-source data 1, Supplementary File 1G-11.

329

### 330 The rate of spontaneous resistance and resulting cross-resistance determine treatment efficacy

331 We used the collected information to identify the critical determinant(s) of treatment efficacy in the  
 332 CAR-CEF-DOR triple  $\beta$ -lactam experiment. We assessed the influence of either the two experimental  
 333 predictors (switching rate, temporal irregularity) or the three biological predictors (hysteresis,  
 334 probability of spontaneous resistance and resulting cross-resistance) on each of the evolutionary

335 responses extinction, rate of growth adaptation, and multidrug resistance, using separate GLM-based  
336 analyses (see methods; Supplementary File 1J-1O). For the biological predictors, we calculated the  
337 levels of cumulative hysteresis, cumulative probability of spontaneous resistance, and the cumulative  
338 levels of cross-resistance in each of the 16 individual treatments up to transfer 12 (see methods). We  
339 focused our analysis on the early phase of evolution up to transfer 12, as it appeared most critical for  
340 treatment efficacy, especially for population extinctions that usually occurred early (Figure 1E). Our  
341 analysis revealed that extinction was significantly associated with both the experimental predictors,  
342 switching rate (GLM,  $F=14.44$ ,  $p=0.0042$ , Figure 5B, Supplementary File 1J-1M) and temporal  
343 irregularity (GLM,  $F=10.53$ ,  $p=0.0101$ , Supplementary File 1M). Temporal irregularity further showed  
344 a statistical trend with multidrug resistance (GLM,  $F=4.19$ ,  $p=0.0711$ , Supplementary File 1M). From  
345 our biological predictors, the cumulative cross-resistant fraction showed a significant association  
346 with extinction (GLM,  $F=10.42$ ,  $p=0.0121$ , Supplementary File 1O), while cumulative probability of  
347 spontaneous resistance showed a statistical trend (GLM,  $F=4.14$ ,  $p=0.0763$ , Supplementary File 1O).  
348 Indeed, the cumulative cross-resistant fraction and also the cumulative probability of spontaneous  
349 resistance are strongly correlated with extinction (Figure 5B). The cumulative cross-resistant fraction  
350 is also strongly correlated with switching rate (Figure 5-figure supplement 1), most likely explaining  
351 the latter impact on extinction. By contrast, cumulative hysteresis levels did not have a significant  
352 influence on any of the evolutionary responses (GLM,  $F=0.16$ ,  $p=0.7015$ , Supplementary File 1O).  
353 Taken together, our results suggest that in our sequential CAR-CEF-DOR treatments the switching  
354 rate, temporal irregularity of antibiotics, the probability of spontaneous resistance, and especially the  
355 resulting collateral effects (maximized by switching rate) determine treatment efficacy through their  
356 effect on bacterial extinction. The limiting factor appears to be constrained evolution of resistance  
357 and low levels of cross-resistance to DOR.

358



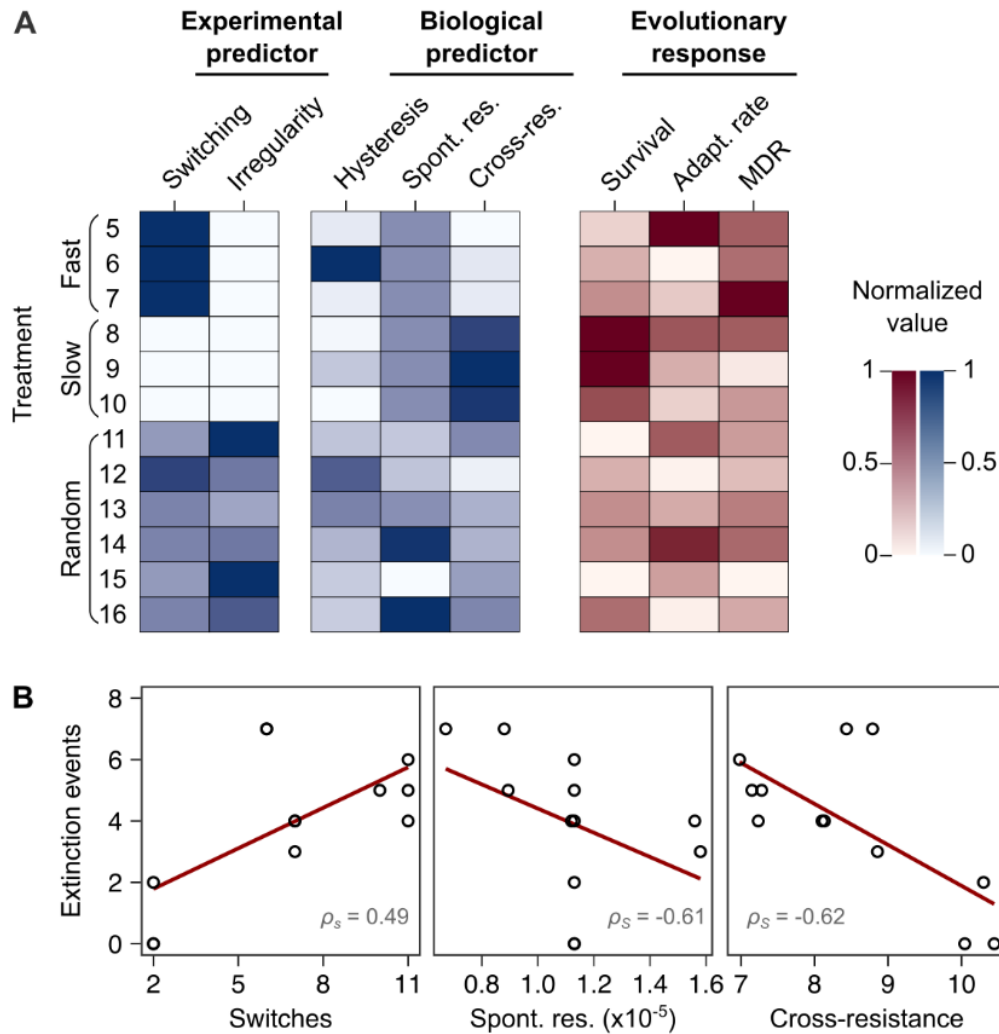

359

360 **Figure 5. Bacterial extinction is correlated to switching rate, spontaneous rate of resistance and**  
 361 **spontaneous cross-resistance. (A)** Variation in experimental parameters, potential biological  
 362 predictors, and the measured traits up to transfer 12. The experimental parameters include switching  
 363 rate, and regularity of change (high irregularity in dark). Potential biological predictors are cumulative  
 364 levels of hysteresis (dark indicates protective effects), cumulative probabilities of spontaneous  
 365 resistance (Spont. res., dark indicates higher probability), and cumulative level of collateral effects  
 366 (Cross-res., dark indicates high fraction of cross-resistance). The evolutionary response was  
 367 measured for population survival (max=12), adaptation rate (Adapt. rate,  $n \leq 12$ , extinct lineages  
 368 excluded), evolved multidrug resistance to treatment antibiotics CAR, DOR, and CEF (MDR,  $n=16$ ). **(B)**  
 369 Variation in extinction was best explained by collateral effects between the antibiotics (for illustrative  
 370 purposes, the red line depicts linear regression and  $\rho_s$  the Spearman's rank correlation coefficient).  
 371 The following supplementary material is available for Figure 5: Figure 5-figure supplement 1, Figure  
 372 5-source data 1, Supplementary File 1J-10.

## 373 DISCUSSION

374 Treatment with multiple  $\beta$ -lactam antibiotics is generally avoided, due to the perceived fear of  
375 therapy failure from cross-resistance. Our work now challenges this wide-spread belief. We  
376 characterized the ability of replicate *P. aeruginosa* populations to evolve *de-novo* resistance to  
377 sequential treatments with different drug sets. To our surprise, we found that sets of three  $\beta$ -lactams  
378 constrained bacterial adaptation by reducing bacterial survival. We demonstrate that treatment  
379 potency was determined by variation in the spontaneous rate of resistance to the  $\beta$ -lactams and the  
380 resulting collateral effects across sequential treatment protocols.

381 Our initial screen of sequential protocols with different antibiotic triplets revealed that the triple  $\beta$ -  
382 lactam sequences are at least as effective at causing extinction as sequences of antibiotics with  
383 distinct modes of actions. This finding is at first sight counter-intuitive, but at second sight not  
384 completely unexpected. The joint application of two  $\beta$ -lactam drugs was in fact tested and found  
385 effective in a few previous studies (Rahme et al., 2014). For example, the  $\beta$ -lactam aztreonam was  
386 shown to interact synergistically with four other  $\beta$ -lactam drugs against multiple resistant isolates of  
387 *Enterobacteriaceae* and *P. aeruginosa* *in vitro* (Buesing and Jorgensen, 1984). A combination of  
388 ticarcillin with ceftazidime produced high efficacy in a rat peritonitis model (Shyu et al., 1987). In a  
389 treatment of bacterial soft tissue infections, the combination of cefotaxin and mecillinam led to  
390 higher clinical response rates than the tested monotherapy (File and Tan, 1983). Further, the dual  $\beta$ -  
391 lactam combination of ceftazidime plus piperacillin was as effective as the combination of  
392 ceftazidime and tobramycin in granulocytopenic cancer patients (Joshi et al., 1993). More recent  
393 studies demonstrated that a triple combination of meropenem, piperacillin and tazobactam  
394 successfully constrained resistance evolution in Methicillin-resistant *Staphylococcus aureus* (MRSA),  
395 both *in vitro* and in a mouse model (Gonzales et al., 2015). In addition, the combination of  
396 cefotaxime and mecillinam was effective against *Salmonella enterica* harbouring a mutant  $\beta$ -  
397 lactamase in a mouse model (Rosenkilde et al., 2019). Our findings add to the high potency of  
398 treatments with multiple  $\beta$ -lactams. We conclude that the use of multiple  $\beta$ -lactams, either as a  
399 combination or sequentially, is a commonly underappreciated form of therapy and its use opens new  
400 avenues to better utilize our existing antibiotic armamentarium.

401 Spontaneous rate of antibiotic resistance was found to play a critical role in the success of the CAR-  
402 CEF-DOR sequential treatment. The probability of spontaneous resistance on all three  $\beta$ -lactams was  
403 significantly different, with the rate of DOR resistance being the lowest. These rates determined the  
404 overall probability of acquiring direct resistance in treatment, which significantly correlated with the  
405 frequency of population extinction (Figure 5B). Resistance rates were previously shown to vary

406 towards different antibiotics, for example in *E. coli* (Meouche and Dunlop, 2018) and *P. aeruginosa*  
407 (Oliver et al., 2004). This variation can arise from genetic factors such as mutational target space and  
408 physiological factors like activation of the bacterial SOS response (Martinez and Baquero, 2000). Such  
409 information on resistance rates have so far been used for predicting the occurrence of resistance  
410 against single drugs, and antibiotics that target multiple pathways in a cell are considered  
411 advantageous in this context (Ross-Gillespie and Kümmerli, 2014). One example of the latter are  
412 compounds against *S. aureus* that inhibit both, DNA gyrase and Topoisomerase IV (Nyerges et al.,  
413 2020). The rate of resistance emergence may also be reduced by using adjuvants that target the SOS  
414 response (Bell and MacLean, 2018), as previously shown for compounds interfering with LexA activity  
415 leading to reduced resistance rates to ciprofloxacin and rifampicin in *E. coli* (Cirz et al., 2005). Our  
416 study extends the role of resistance rates of antibiotics beyond this convention. We show that  
417 inclusion of an antibiotic with relatively low spontaneous resistance emergence can enhance the  
418 potency of a sequential treatment design.

419 What could be the underlying reasons for the particular importance of DOR compared with the other  
420  $\beta$ -lactams? DOR belongs to the carbapenem subclass of the  $\beta$ -lactam antibiotics. Carbapenems  
421 possess broad activity against Gram-positive and Gram-negative bacteria (Papp-Wallace et al., 2011)  
422 and are active against many  $\beta$ -lactamase producing microbes, since their thiazolidinic ring makes  
423 them relatively resistant to  $\beta$ -lactamase-mediated hydrolysis (Schafer et al., 2009). In contrast, the  
424 penicillin CAR is active mostly (albeit not exclusively) against Gram-negative bacteria (Castle, 2007)  
425 while the activity of the cephalosporin CEF is restricted to *P. aeruginosa* (Wright, 1986). Within *P.*  
426 *aeruginosa*, all three antibiotics show high potency against a large variety of clinical isolates  
427 (Castanheira et al., 2009; Neu and Scully, 1984; Traub and Raymond, 1970). Resistance rates for  $\beta$ -  
428 lactam antibiotics were assessed with different approaches across *P. aeruginosa* strains and clinical  
429 isolates, consistently showing that DOR has a particularly low propensity to select for resistance  
430 mutations, even when compared to other carbapenems (Barbosa et al., 2017, 2021; Sakyo et al.,  
431 2006; Tanimoto et al., 2008; Mushtaq et al., 2004; Fujimura et al., 2009). Therefore, the phenotype  
432 of reduced spontaneous resistance to DOR appears to be robustly expressed across different *P.*  
433 *aeruginosa* genotypes and does not extend to other carbapenems or  $\beta$ -lactams. One possible reason  
434 for this pattern may be variation in the range of  $\beta$ -lactam target proteins, in this case the penicillin  
435 binding proteins (PBPs), and where DOR is known to bind more of these PBPs than do CAR or CEF  
436 (Davies et al., 2008; Fontana et al., 2000; Rodriguez-Tebár et al., 1982; Rodríguez-Tebar et al., 1982;  
437 Zapun et al., 2008; Zimmermann, 1980). Thus, target resistance to DOR would likely require a larger  
438 number of mutations than that to other  $\beta$ -lactams. Interestingly, another carbapenem, meropenem,  
439 targets the same PBPs as DOR (Davies et al., 2008) but has a higher resistant rate, suggesting that the

440 underlying reasons for resistance rate variation are multifactorial. Taken together, effective  
441 resistance mutations against DOR seem to be less commonly available in *P. aeruginosa* in comparison  
442 to that against other drugs, including the here used CEF and CAR.

443 A key determinant of treatment potency was the reduced level of spontaneous cross-resistance to  
444 the sequentially applied drugs (Figure 5B). This effect was maximized by the switching rate (Figure 5-  
445 figure supplement 1). Our findings are consistent with the previously and repeatedly proposed  
446 importance of collateral sensitivity for the efficacy of sequential treatment protocols (Barbosa et al.,  
447 2019; Hernando-Amado et al., 2020; Imamovic and Sommer, 2013; Kim et al., 2014; Maltas and  
448 Wood, 2019; Yen and Papin, 2017). Even though we did not measure collateral sensitivity directly,  
449 the lack of cross-resistance is related, as it indicates that the mutant cells, which have become  
450 resistant to one drug, maintain at least ancestral levels of susceptibility against the second drug.  
451 Moreover, our study focused on spontaneous emergence of cross-resistance (or lack thereof). By  
452 contrast, many previous studies established collateral effects after bacteria evolved resistance to the  
453 first drug over many generations, often followed by only a single antibiotic switch to assess the  
454 impact of collateral sensitivity on therapy success (Barbosa et al., 2019; Hernando-Amado et al.,  
455 2020; Imamovic and Sommer, 2013; Yen and Papin, 2017). Surprisingly, our study revealed  
456 potentially beneficial collateral effects between antibiotics of the same class. In fact, we chose these  
457 three  $\beta$ -lactams because our previous work demonstrated cross-resistance between most of them,  
458 although inferred upon multigenerational adaptation to the first drug (Barbosa et al., 2017). Our  
459 current finding of a lack of cross-resistance among some of these drugs now suggests that  
460 spontaneous mutants may have different collateral profiles than the lines, which adapted over many  
461 generations. Our results further suggest that the collateral effects of spontaneous mutants are likely  
462 to be more pertinent for the design of sequential treatments with fast switches among antibiotics.  
463 This suggestion is supported by two previous studies, in which the efficacy of fast sequential  
464 treatments was optimized by considering collateral effects for either single-step mutants of  
465 *Staphylococcus aureus*, obtained after 20 h exposure to three distinct antibiotics for 20 h (Kim et al.,  
466 2014), or from *Enterococcus faecalis* populations adapted over two days to four distinct antibiotics  
467 (Maltas and Wood, 2019). As a side note, it is particularly interesting that our detailed resistance  
468 analysis consistently revealed almost all treatments to cause the evolution of collateral sensitivity  
469 towards the aminoglycoside gentamicin, but not the fluoroquinolone ciprofloxacin (Figure 2B, 2C),  
470 possibly indicating yet another treatment option – in cases where the applied triple  $\beta$ -lactam  
471 sequential protocols fail.

472 Temporal irregularity was additionally found to constrain bacterial adaptation. When bacteria  
473 experienced the antibiotics in an irregular pattern, this caused significantly increased extinction and

474 to some degree reduced multidrug resistance. With CAR-DOR-CEF, the lowest multidrug resistance  
475 was observed in random sequential treatments (Figure 2-figure supplement 5), as also previously  
476 observed with CIP-GEN-CAR (Roemhild et al., 2018). Environmental change anticipation has been  
477 documented in several microorganisms (Mitchell et al., 2009; Mitchell and Pilpel, 2011), indicating  
478 their capability to specifically adapt to regular environmental change. Stochastic changes can make it  
479 harder to evolve anticipation (Roemhild and Schulenburg, 2019). Stochastic changes in  
480 environmental parameters were indeed found to constrain fitness in evolving bacteria (Hughes et al.,  
481 2007) and viruses (Alto et al., 2013). We show that irregular antibiotic sequences have potential to  
482 inhibit bacterial resistance evolution.

483 Unexpectedly, we further identified negative hysteresis for multiple combinations of the three  $\beta$ -  
484 lactams. However, cumulative hysteresis levels per treatment did not significantly associate with any  
485 of our measured evolutionary responses. In our previous study (Roemhild et al., 2018), within the  
486 CAR-CIP-GEN combination, negative hysteresis was expressed for the switches from CAR to GEN and  
487 CIP to GEN. Yet, only the CAR-GEN hysteresis was significantly associated to the evolutionary  
488 responses. Thus, hysteresis interactions can exist between antibiotics from the same or different  
489 classes, but they need not impact the evolutionary outcome of a sequential treatment protocol each  
490 time. In the current study, it appears that spontaneous resistance effects and the resulting cross-  
491 resistance effects are dominant over the  $\beta$ -lactam hysteresis. One potential explanation could be  
492 that insensitivity to  $\beta$ -lactam hysteresis evolves quickly. Nevertheless, it clearly warrants further  
493 research to assess whether negative hysteresis between the  $\beta$ -lactam drugs is robustly shown across  
494 strains of *P. aeruginosa* or other bacterial species and can somehow be exploited in sequential  
495 therapy, in analogy to the previous results with antibiotics from different classes (Roemhild et al.,  
496 2018).

497 Taken together, our study highlights that the available antibiotics offer unexplored, highly potent  
498 treatment options that can be harnessed to counter the spread of drug resistance. It further  
499 underscores the importance of evolutionary trade-offs such as reduced cross-resistance in treatment  
500 design and introduces spontaneous resistance rates of component antibiotics as a guiding principle  
501 for sequential treatments. It is ironic, that the differential cross-resistance landscape of the  $\beta$ -lactams  
502 was a key factor contributing to treatment potency, even though the risk of cross-resistance is  
503 usually used to reject  $\beta$ -lactam exclusive treatments. The underlying reasons for differential  
504 spontaneous and cross-resistance between these drugs (including the underlying molecular  
505 mechanisms) are as yet unknown and clearly deserve further attention in the future. We conclude  
506 that a detailed understanding of both spontaneous resistance rates and resulting cross-resistances

507 against different antibiotics should be of particular value to further improve the potency of  
508 sequential protocols.

509

510 **MATERIALS AND METHODS**

| <b>Key Resources Table</b>                         |                     |                                                                                               |                    |                               |
|----------------------------------------------------|---------------------|-----------------------------------------------------------------------------------------------|--------------------|-------------------------------|
| <b>Reagent type (species) or resource</b>          | <b>Designation</b>  | <b>Source or reference</b>                                                                    | <b>Identifiers</b> | <b>Additional information</b> |
| strain, strain background (Pseudomonas aeruginosa) | PA14                | <a href="https://doi.org/10.1126/science.7604262">https://doi.org/10.1126/science.7604262</a> | UCBPP-PA14         |                               |
| chemical compound, drug                            | AZL (azlocillin)    | Sigma                                                                                         | A7926-1G           |                               |
| chemical compound, drug                            | CAR (carbenicillin) | Carl Roth                                                                                     | 6344.2             |                               |
| chemical compound, drug                            | CIP (ciprofloxacin) | Sigma                                                                                         | 17850-5G-F         |                               |
| chemical compound, drug                            | CEF (cefsulodin)    | Carl Roth                                                                                     | 4014.2             |                               |
| chemical compound, drug                            | CEZ (ceftazidime)   | Sigma                                                                                         | C3809.1G           |                               |
| chemical compound, drug                            | DOR (doripenem)     | Sigma                                                                                         | 32138-25MG         |                               |
| chemical compound, drug                            | GEN (gentamicin)    | Carl Roth                                                                                     | 2475.1             |                               |

|                         |                                                          |                                                                     |          |  |
|-------------------------|----------------------------------------------------------|---------------------------------------------------------------------|----------|--|
| chemical compound, drug | STR<br>(streptomycin)                                    | Sigma                                                               | S6501-5  |  |
| chemical compound, drug | TIC<br>(ticarcillin)                                     | Sigma                                                               | T5639-1G |  |
| software, algorithm     | R: A language and environment for statistical computing. | <a href="https://www.R-project.org/">https://www.R-project.org/</a> |          |  |

511

## 512 **Materials**

513 All experiments were performed with *P. aeruginosa* UCBPP-PA14 (Rahme et al., 1995). Bacteria were  
514 grown in M9 minimal medium supplemented with glucose (2 g/L), citrate (0.58 g/L) and casamino  
515 acids (1 g/L) or on M9 minimal agar (1.5%) or Lysogeny broth (LB) agar. Antibiotics were added as  
516 indicated. Cultures and plates were incubated at 37°C. Experiments included biological replicates  
517 (initiated with independent clones of the bacteria, which were grown separately before the start of  
518 the experiment, or independent evolutionary lineages from the respective evolution treatments) and  
519 technical replicates (initiated from the same starting culture of the bacteria), as indicated below. For  
520 the experiments, treatment groups were run in parallel and randomized. Treatment names were  
521 masked, in order to minimize observer bias.

## 522 **Dose-response curves of ancestor**

523 We used dose-response curves based on broth microdilution, in order to determine antibiotic  
524 concentration causing inhibition level of 25% growth yield relative of untreated controls (inhibitory  
525 concentration 75; IC75) for the antibiotics azlocillin (AZL), carbenicillin (CAR), ciprofloxacin (CIP),  
526 cefsulodin (CEF), ceftazidime (CTZ), doripenem (DOR), gentamicin (GEN) and ticarcillin (TIC; see  
527 Supplementary File 1A for details on antibiotics). Briefly, bacteria were grown to exponential phase  
528 ( $OD_{600} = 0.08$ ) and inoculated into 96-well plates (100  $\mu$ l per well,  $5 \times 10^6$  CFU/ml) containing linear  
529 concentration ranges close to minimum inhibitory concentration (MIC) of the antibiotics in M9  
530 medium. Antibiotic concentrations were randomized spatially. Bacteria were incubated for 12 hours  
531 after which optical density was measured in BioTek EON plate readers at 600 nm ( $OD_{600}$ ). We  
532 included 6 biological replicates and 1-2 technical replicates per concentration and antibiotic. Optical  
533 density was plotted against antibiotic concentration to obtain a dose-response curve. Model fitting



534 was carried out using the package *drc* (Ritz et al., 2015) in the statistical environment R and the fitted  
535 curve was used to predict IC75 values (Figure 1-figure supplement 1).

536

### 537 **Evolution experiments**

538 We carried out evolution experiments with the various combination of antibiotics according to the  
539 design described previously (Roemhild et al., 2018). A total of 16 treatments were included (Figure  
540 1B). Treatments 1-4 were constant environments consisting of the monotherapy (#1-3) and no drug  
541 control (#4). Treatments 5-10 were the regular switching treatments. They switched between the  
542 antibiotics in a regular predictable fashion, either every transfer (fast; #5-7) or every fourth transfer  
543 (slow; #8-10). Treatments 11-16 consisted of the random treatments which switched fast in a  
544 temporally irregular fashion. The setup was designed to test the effect of switching rate and  
545 temporal irregularity.

546 Every treatment consisted of 12 replicate populations (initiated from 6 biological replicates x 2  
547 technical replicates). All populations were started with an inoculum of  $5 \times 10^5$  cells. Populations were  
548 propagated as 100  $\mu$ L batch cultures in 96-well plates, with a transfer to fresh medium every 12  
549 hours (transfer size 2% v/v). Antibiotic selection was applied at IC75 throughout. We monitored  
550 growth by OD<sub>600</sub> measurements taken every 15 min through the entire evolution experiment (BioTek  
551 Instruments, USA; Ref. EON; 37 °C, 180 rpm double-orbital shaking). Evolutionary growth dynamics  
552 were assessed by plotting the final OD achieved in every transfer (relative to final OD of no drug  
553 control; relative yield). Adaptation rate was calculated with a sliding window approach, where  
554 adaptation rate was the inverse of the transfer at which the mean relative yield of a sliding window  
555 of 12 transfers reached 0.75 for the first time. Cases of extinction were determined at the end of the  
556 experiment by counting wells in which no growth was observed after an additional incubation in  
557 antibiotic-free medium. Samples of the populations were frozen in regular intervals in 10% (v/v)  
558 DMSO and stored at -80 °C for later analysis. The evolution experiments were carried out for a total  
559 of 96 transfers.

### 560 **Resistance measurements of evolved populations**

561 We characterized populations frozen at transfers 12 and 48 in detail, because they represented the  
562 early and late phases of the evolution experiment. One population, originating from a single  
563 biological replicate was chosen per treatment and plated onto LB agar. After incubation at 37°C, 20  
564 colonies from each population were picked randomly and frozen in 10% (v/v) DMSO and stored at  
565 -80°C. These colonies, termed isolates, were considered to be representative biological replicates for

566 each population. We constructed dose-response curves for the isolates, using for each evolved  
567 population 1 technical replicate per isolate and 4 technical replicates of the ancestral PA14 strain, as  
568 described above, for the antibiotics CAR, CEF, DOR, GEN and CIP. The integral of this curve for every  
569 isolate was calculated and the integral of the ancestral PA14 control subtracted. The resulting value  
570 was resistance of the isolate on the said antibiotic. We identified subpopulations in any given  
571 population by hierarchical clustering of the resistance profiles, as previously described (Roemhild et  
572 al., 2018). Resistance of a population was calculated by averaging the resistance of the isolates.  
573 Resistance of the population on CAR, CEF, and DOR were added to obtain a single value for multidrug  
574 resistance.

### 575 **Whole-genome sequencing**

576 From the frozen isolates at transfer 12, we chose 3 isolates per population (i.e., three biological  
577 replicates per population) for whole genome sequencing to determine possible targets of selection.  
578 Each resistance cluster in the population was represented in the sequenced isolates. For the DOR  
579 monotherapy isolates from transfer 48 were also sequenced as no phenotypic resistance was  
580 observed at transfer 12. Frozen isolates were thawed and grown in M9 medium at 37 °C for 16-20  
581 hours. We extracted DNA using a modified CTAB protocol (von der Schulenburg et al., 2001) and  
582 sequenced it at the Competence Centre for Genomic Analysis Kiel (CCGA Kiel; Institute for Clinical  
583 Microbiology, University Hospital Kiel), using Illumina Nextera DNA Flex library preparation and the  
584 MiSeq paired-end technology (2 x 300 bp). Quality control on the resulting raw reads was performed  
585 with FastQC (Andrews, 2010) and low quality reads were trimmed using Trimmomatic (Bolger et al.,  
586 2014). We then used MarkDuplicates from the Picard Toolkit (<http://broadinstitute.github.io/picard/>)  
587 to remove duplicate reads and mapped the remaining reads to the *P. aeruginosa* UCBPP-PA14  
588 genome (available at <http://pseudomonas.com/strain/download>) using Bowtie2 and samtools  
589 (Langmead and Salzberg, 2012; Li et al., 2009). Variant calling was done using the GATK suite (Poplin  
590 et al., 2018) and the called variants were annotated using SnpEFF (Cingolani et al., 2012) and the  
591 Pseudomonas Genome Database ([www.pseudomonas.com](http://www.pseudomonas.com)). We removed all variants that were  
592 detected in the no drug control as they likely represent adaptation to the medium and not the  
593 antibiotic. The fasta files of all sequenced isolates are available from NCBI under the BioProject  
594 number: PRJNA704789.

### 595 **Hysteresis testing**

596 The presence of cellular hysteresis was tested, following the previously developed protocol  
597 (Roemhild et al., 2018). Bacterial cells were grown to exponential phase ( $OD_{600} = 0.08$ ), diluted 10-  
598 fold and treated with IC75 of the first antibiotic. In the treatments where the pretreatment did not

599 require an antibiotic, none was added. These cells were allowed to incubate for 15 min at 37°C and  
600 150 rpm (pretreatment). After this, the first antibiotic was removed by centrifugation and fresh  
601 medium containing IC75 of a second antibiotic was added. In cases where the main treatment did  
602 not require an antibiotic, fresh medium without an antibiotic was added. Bacteria were now  
603 incubated for 8 hours at 37°C and 150 rpm (main treatment). Bacterial count was monitored through  
604 the main treatment by spotting assays. We used three biological replicates per treatment and, for  
605 CFU counting, four technical replicates per biological replicate and treatment.  $\log_{10}$  CFU/mL were  
606 plotted against time to obtain time-kill curves (Figure 3B). The level of hysteresis was calculated as  
607 the difference between the antibiotic switch and only main treatment curves.

#### 608 **Agar dilution**

609 We determined the MIC on M9 agar for the antibiotics CAR, CEF and DOR according to the EUCAST  
610 protocol (<https://doi.org/10.1046/j.1469-0691.2000.00142.x>) that was modified to account for  
611 inoculum effect in our fluctuation assay setup. UCBPP-PA14 was grown in M9 medium at 37°C for 20  
612 hours.  $5 \times 10^5$  cells were taken from the stationary phase cultures and spread on M9 agar plates  
613 containing doubling dilutions of the antibiotic. Plates were incubated at 37°C for 20-24 hours. MIC  
614 was read as the lowest concentration at which no growth of bacteria was seen. MIC determination  
615 for each antibiotic was done for three biological replicates (no additional technical replication).

#### 616 **Fluctuation assay**

617 We measured resistance rates on the three  $\beta$ -lactams using the classic fluctuation assay (Luria and  
618 Delbrück, 1943). Briefly, a single colony of UCBPP-PA14 was inoculated to 10 mL M9 and incubated at  
619 37°C, 150 rpm for 20 hours. This primary culture was used to start 30 parallel cultures all having a  
620 starting concentration of  $10^2$  CFU/mL. The parallel cultures were considered biological replicates and  
621 incubated at 37°C, 150 rpm for 20 hours. Thereafter,  $5 \times 10^5$  cells were plated onto MIC plates of  
622 CAR, CEF and DOR. The plates were incubated for 40 hours at 37°C. The resulting mutant colonies  
623 were taken and patched on identical antibiotic MIC plates to ensure genetic resistance. Colonies  
624 which grew after patching were counted. We used counts from all 30 cultures to estimate resistance  
625 rate on each antibiotic using the package *rSalvador* (Zheng, 2017) in R.

#### 626 **Patching assay**

627 We assessed the extent of cross-resistance associated with each  $\beta$ -lactam using the mutants  
628 obtained from the fluctuation assay. Sixty mutants with genetic resistance to a given  $\beta$ -lactam were  
629 considered biological replicates and patched onto MIC plates of the two other  $\beta$ -lactams. The  
630 patched plates were incubated for 16-20 hours at 37°C. If the mutant grew at MIC of the second  $\beta$ -

631 lactam it was counted as resistant. If it did not grow at the MIC of the second  $\beta$ -lactam it was  
632 counted as susceptible. For each switch between two drugs, the fraction of cross-resistant mutants  
633 was calculated as

$$\frac{\text{Number of mutants that grew on drug B}}{\text{Total mutants isolated on drug A}}$$

#### 634 **Statistical analysis for cross-resistance on secondary antibiotic**

635 To test whether the secondary antibiotic had an influence on the degree of cross-resistance of the  
636 mutants obtained from the fluctuation assay we conducted a Fischer's exact test followed by posthoc  
637 comparisons using the R package *rcompanion* (Mangiafico, 2016). The obtained p-values were then  
638 corrected for multiple testing using false discovery rate.

#### 639 **Statistical analysis of adaptive growth dynamics**

640 To test whether main treatment types were associated with altered dynamics of adaptation in non-  
641 extinct populations, we analyzed the trajectories of relative growth yield (as plotted in Figure 1E and  
642 Figure 2A) of drug-treated populations using a general linear model (GLM), including sequence (##1-  
643 16) and transfer as fixed factors and preculture and replicate population as nested random factors  
644 (see Supplementary File 1B for details). Comparisons between main treatment groups were  
645 performed using pairwise posthoc tests and z statistics. All p-values were corrected for multiple  
646 testing using false discovery rate. The analysis was performed separately for the three time phases  
647 "early" (transfers 2-12), "middle" (transfers 13-48), and "late" (transfers 49-96) of the experiment,  
648 thus fulfilling the model assumption of response linearity. All statistical analyses were carried out in  
649 the statistical environment R.

#### 650 **Statistical analysis of evolved multidrug $\beta$ -lactam resistance**

651 To test whether evolved populations displayed distinct multidrug  $\beta$ -lactam resistance depending on  
652 their main treatment type, we analyzed multidrug  $\beta$ -lactam resistance of evolved isolates – the sum  
653 of resistance values against CAR, CEF, and DOR (as plotted in Figure 3B and C) – using a general linear  
654 model (GLM). The model included sequence (##1-16) as fixed factor and replicate population as  
655 nested random factor (see Supplementary File 1C for detailed information). Comparisons between  
656 main treatment groups were performed using pairwise posthoc tests and z statistics. All p-values  
657 were corrected for multiple testing using false discovery rate. The analysis was performed separately  
658 for the "early" (after transfers 12) and "middle" (transfer 48) time points of the evolution  
659 experiment, using the R statistical environment.

#### 660 **Statistical analysis of treatment potency predictors**

661 To test whether our experimental (switching rate and temporal irregularity) and biological predictors  
662 (hysteresis, probability of direct resistance and cross effects) were able to explain the variability in  
663 our evolutionary responses (extinction, rate of growth adaptation and multidrug resistance) we  
664 carried out a general linear model (GLM) analysis. Values per treatment protocol for the biological  
665 predictors were calculated and the GLM analysis then carried out in R. We used the *lm* and *anova*  
666 commands and the main effects model: response ~ switching rate + irregularity for the experimental  
667 predictors and response ~ hysteresis + spontaneous resistance + mutant fraction cross-resistant for  
668 the biological predictors.

669

## 670 **ACKNOWLEDGEMENTS**

671 We would like to thank Leif Tueffers and João Botelho for discussions and suggestions as well as Kira  
672 Haas and Julia Bunk for technical support. We acknowledge financial support from the German  
673 Science Foundation (grant SCHU 1415/12-2 to HS, and funding under Germany's Excellence Strategy  
674 EXC 2167–390884018 as well as the Research Training Group 2501 TransEvo to HS and SN), the Max-  
675 Planck Society (IMPRS scholarship to AB; Max-Planck fellowship to HS), and the Leibniz Science  
676 Campus Evolutionary Medicine of the Lung (EvoLUNG, to HS and SN). This work was further  
677 supported by the German Science Foundation Research Infrastructure NGS\_CC (project 407495230)  
678 as part of the Next Generation Sequencing Competence Network (project 423957469). NGS analyses  
679 were carried out at the Competence Centre for Genomic Analysis Kiel (CCGA Kiel).

680

## 681 **COMPETING INTERESTS STATEMENT**

682 The authors declare no competing interests.

683 REFERENCES

- 684 Alto BW, Wasik BR, Morales NM, Turner PE. 2013. Stochastic temperatures impede RNA virus  
685 adaptation. *Evol Int J Org Evol* **67**:969–979. doi:10.1111/evo.12034
- 686 Andersson DI, Balaban NQ, Baquero F, Courvalin P, Glaser P, Gophna U, Kishony R, Molin S, Tønnum T.  
687 2020. Antibiotic resistance: turning evolutionary principles into clinical reality. *FEMS*  
688 *Microbiol Rev* **44**:171–188. doi:10.1093/femsre/fuaa001
- 689 Andrews S. 2010. FastQC: A Quality Control Tool for High Throughput Sequence Data.
- 690 Band VI, Hufnagel DA, Jaggavarapu S, Sherman EX, Wozniak JE, Satola SW, Farley MM, Jacob JT, Burd  
691 EM, Weiss DS. 2019. Antibiotic combinations that exploit heteroresistance to multiple drugs  
692 effectively control infection. *Nat Microbiol* **1**. doi:10.1038/s41564-019-0480-z
- 693 Barbosa C, Beardmore R, Schulenburg H, Jansen G. 2018. Antibiotic combination efficacy (ACE)  
694 networks for a *Pseudomonas aeruginosa* model. *PLOS Biol* **16**:e2004356.  
695 doi:10.1371/journal.pbio.2004356
- 696 Barbosa C, Mahrt N, Bunk J, Graßer M, Rosenstiel P, Jansen G, Schulenburg H. 2021. The Genomic  
697 Basis of Rapid Adaptation to Antibiotic Combination Therapy in *Pseudomonas aeruginosa*.  
698 *Mol Biol Evol* **38**:449–464. doi:10.1093/molbev/msaa233
- 699 Barbosa C, Römhild R, Rosenstiel P, Schulenburg H. 2019. Evolutionary stability of collateral  
700 sensitivity to antibiotics in the model pathogen *Pseudomonas aeruginosa*. *eLife* **8**:e51481.  
701 doi:10.7554/eLife.51481
- 702 Barbosa C, Trebosc V, Kemmer C, Rosenstiel P, Beardmore R, Schulenburg H, Jansen G. 2017.  
703 Alternative Evolutionary Paths to Bacterial Antibiotic Resistance Cause Distinct Collateral  
704 Effects. *Mol Biol Evol* **34**:2229–2244. doi:10.1093/molbev/msx158
- 705 Baym M, Stone LK, Kishony R. 2016. Multidrug evolutionary strategies to reverse antibiotic  
706 resistance. *Science* **351**:aad3292. doi:10.1126/science.aad3292
- 707 Bell G, MacLean C. 2018. The Search for ‘Evolution-Proof’ Antibiotics. *Trends Microbiol* **26**:471–483.  
708 doi:10.1016/j.tim.2017.11.005
- 709 Bloemberg GV, Keller PM, Stucki D, Stuckia D, Trauner A, Borrell S, Latshang T, Coscolla M, Rothe T,  
710 Hömke R, Ritter C, Feldmann J, Schulthess B, Gagneux S, Böttger EC. 2015. Acquired  
711 Resistance to Bedaquiline and Delamanid in Therapy for Tuberculosis. *N Engl J Med*  
712 **373**:1986–1988. doi:10.1056/NEJMc1505196
- 713 Bolger AM, Lohse M, Usadel B. 2014. Trimmomatic: a flexible trimmer for Illumina sequence data.  
714 *Bioinformatics* **30**:2114–2120. doi:10.1093/bioinformatics/btu170
- 715 Buesing MA, Jorgensen JH. 1984. In vitro activity of aztreonam in combination with newer beta-  
716 lactams and amikacin against multiply resistant gram-negative bacilli. *Antimicrob Agents*  
717 *Chemother* **25**:283–285.
- 718 Cabot G, Florit-Mendoza L, Sánchez-Diener I, Zamorano L, Oliver A. 2018. Deciphering  $\beta$ -lactamase-  
719 independent  $\beta$ -lactam resistance evolution trajectories in *Pseudomonas aeruginosa*. *J*  
720 *Antimicrob Chemother* **73**:3322–3331. doi:10.1093/jac/dky364
- 721 Castanheira M, Jones RN, Livermore DM. 2009. Antimicrobial activities of doripenem and other  
722 carbapenems against *Pseudomonas aeruginosa*, other nonfermentative bacilli, and  
723 *Aeromonas* spp. *Diagn Microbiol Infect Dis* **63**:426–433.  
724 doi:10.1016/j.diagmicrobio.2009.01.026
- 725 Castle SS. 2007. Carbenicillin In: Enna SJ, Bylund DB, editors. XPharm: The Comprehensive  
726 Pharmacology Reference. New York: Elsevier. pp. 1–5. doi:10.1016/B978-008055232-  
727 3.61381-9
- 728 Chait R, Crane A, Kishony R. 2007. Antibiotic interactions that select against resistance. *Nature*  
729 **446**:668–671. doi:10.1038/nature05685
- 730 Cingolani P, Platts A, Wang LL, Coon M, Nguyen T, Wang L, Land SJ, Lu X, Ruden DM. 2012. A program  
731 for annotating and predicting the effects of single nucleotide polymorphisms, SnpEff: SNPs in  
732 the genome of *Drosophila melanogaster* strain w1118; iso-2; iso-3. *Fly (Austin)* **6**:80–92.  
733 doi:10.4161/fly.19695



- 734 Cirz RT, Chin JK, Andes DR, de Crécy-Lagard V, Craig WA, Romesberg FE. 2005. Inhibition of mutation  
735 and combating the evolution of antibiotic resistance. *PLoS Biol* **3**:e176.  
736 doi:10.1371/journal.pbio.0030176
- 737 Davies TA, Shang W, Bush K, Flamm RK. 2008. Affinity of Doripenem and Comparators to Penicillin-  
738 Binding Proteins in *Escherichia coli* and *Pseudomonas aeruginosa*. *Antimicrob Agents*  
739 *Chemother* **52**:1510–1512. doi:10.1128/AAC.01529-07
- 740 File TM, Tan JS. 1983. Amdinocillin plus cefoxitin versus cefoxitin alone in therapy of mixed soft tissue  
741 infections (including diabetic foot infections). *Am J Med*, An International Review of  
742 Amdinocillin: A New Beta-Lactam Antibiotic **75**:100–105. doi:10.1016/0002-9343(83)90103-1
- 743 Fontana R, Cornaglia G, Ligozzi M, Mazzariol A. 2000. The final goal: penicillin-binding proteins and  
744 the target of cephalosporins. *Clin Microbiol Infect* **6**:34–40. doi:10.1111/j.1469-  
745 0691.2000.tb02038.x
- 746 Fuentes-Hernandez A, Plucain J, Gori F, Pena-Miller R, Reding C, Jansen G, Schulenburg H, Gudelj I,  
747 Beardmore R. 2015. Using a Sequential Regimen to Eliminate Bacteria at Sublethal Antibiotic  
748 Dosages. *PLOS Biol* **13**:e1002104. doi:10.1371/journal.pbio.1002104
- 749 Fujimura T, Anan N, Sugimori G, Watanabe T, Jinushi Y, Yoshida I, Yamano Y. 2009. Susceptibility of  
750 *Pseudomonas aeruginosa* clinical isolates in Japan to doripenem and other antipseudomonal  
751 agents. *Int J Antimicrob Agents* **34**:523–528. doi:10.1016/j.ijantimicag.2009.07.008
- 752 Gonzales PR, Pesesky MW, Bouley R, Ballard A, Bidy BA, Suckow MA, Wolter WR, Schroeder VA,  
753 Burnham C-AD, Mobashery S, Chang M, Dantas G. 2015. Synergistic, collaterally sensitive  $\beta$ -  
754 lactam combinations suppress resistance in MRSA. *Nat Chem Biol* **11**:855–861.  
755 doi:10.1038/nchembio.1911
- 756 Hauser AR, Kang PJ, Engel JN. 1998. PepA, a secreted protein of *Pseudomonas aeruginosa*, is  
757 necessary for cytotoxicity and virulence. *Mol Microbiol* **27**:807–818.  
758 doi:https://doi.org/10.1046/j.1365-2958.1998.00727.x
- 759 Hernando-Amado S, Sanz-García F, Martínez JL. 2020. Rapid and robust evolution of collateral  
760 sensitivity in *Pseudomonas aeruginosa* antibiotic-resistant mutants. *Sci Adv* **6**:eaba5493.  
761 doi:10.1126/sciadv.aba5493
- 762 Hjort K, Jurén P, Toro JC, Hoffner S, Andersson DI, Sandegren L. 2020. Dynamics of extensive drug  
763 resistance evolution of *Mycobacterium tuberculosis* in a single patient during 9 years of  
764 disease and treatment. *J Infect Dis*. doi:10.1093/infdis/jiaa625
- 765 Hughes BS, Cullum AJ, Bennett AF. 2007. An Experimental Evolutionary Study on Adaptation to  
766 Temporally Fluctuating pH in *Escherichia coli*. *Physiol Biochem Zool* **80**:406–421.  
767 doi:10.1086/518353
- 768 Imamovic L, Sommer MOA. 2013. Use of collateral sensitivity networks to design drug cycling  
769 protocols that avoid resistance development. *Sci Transl Med* **5**:204ra132.  
770 doi:10.1126/scitranslmed.3006609
- 771 Joshi JH, Newman KA, Brown BW, Finley RS, Ruxer RL, Moody MA, Schimpff SC. 1993. Double beta-  
772 lactam regimen compared to an aminoglycoside/beta-lactam regimen as empiric antibiotic  
773 therapy for febrile granulocytopenic cancer patients. *Support Care Cancer* **1**:186–194.  
774 doi:10.1007/BF00366445
- 775 Kim S, Lieberman TD, Kishony R. 2014. Alternating antibiotic treatments constrain evolutionary paths  
776 to multidrug resistance. *Proc Natl Acad Sci* **111**:14494–14499. doi:10.1073/pnas.1409800111
- 777 Langmead B, Salzberg SL. 2012. Fast gapped-read alignment with Bowtie 2. *Nat Methods* **9**:357–359.  
778 doi:10.1038/nmeth.1923
- 779 Laxminarayan R, Duse A, Wattal C, Zaidi AKM, Wertheim HFL, Sumpradit N, Vlieghe E, Hara GL, Gould  
780 IM, Goossens H, Greko C, So AD, Bigdeli M, Tomson G, Woodhouse W, Ombaka E, Peralta  
781 AQ, Qamar FN, Mir F, Kariuki S, Bhutta ZA, Coates A, Bergstrom R, Wright GD, Brown ED, Cars  
782 O. 2013. Antibiotic resistance—the need for global solutions. *Lancet Infect Dis* **13**:1057–1098.  
783 doi:10.1016/S1473-3099(13)70318-9



- 784 Lazar V, Pal Singh G, Spohn R, Nagy I, Horvath B, Hrtyan M, Busa-Fekete R, Bogos B, Mehi O, Csorgo  
785 B, Posfai G, Fekete G, Szappanos B, Kegl B, Papp B, Pal C. 2014. Bacterial evolution of  
786 antibiotic hypersensitivity. *Mol Syst Biol* **9**:700. doi:10.1038/msb.2013.57
- 787 Levin-Reisman I, Ronin I, Gefen O, Braniss I, Shores N, Balaban NQ. 2017. Antibiotic tolerance  
788 facilitates the evolution of resistance. *Science* **355**:826–830. doi:10.1126/science.aaj2191
- 789 Li H, Handsaker B, Wysoker A, Fennell T, Ruan J, Homer N, Marth G, Abecasis G, Durbin R, 1000  
790 Genome Project Data Processing Subgroup. 2009. The Sequence Alignment/Map format and  
791 SAMtools. *Bioinformatics* **25**:2078–2079. doi:10.1093/bioinformatics/btp352
- 792 Liao X, Hancock RE. 1995. Cloning and characterization of the *Pseudomonas aeruginosa* pbpB gene  
793 encoding penicillin-binding protein 3. *Antimicrob Agents Chemother* **39**:1871–1874.  
794 doi:10.1128/AAC.39.8.1871
- 795 Livermore DM. 1995. beta-Lactamases in laboratory and clinical resistance. *Clin Microbiol Rev* **8**:557–  
796 584.
- 797 Luria SE, Delbrück M. 1943. Mutations of Bacteria from Virus Sensitivity to Virus Resistance. *Genetics*  
798 **28**:491–511.
- 799 Maltas J, Wood KB. 2019. Pervasive and diverse collateral sensitivity profiles inform optimal  
800 strategies to limit antibiotic resistance. *PLOS Biol* **17**:e3000515.  
801 doi:10.1371/journal.pbio.3000515
- 802 Mangiafico SS. 2016. Summar and analysis of extension program evaluation in R. 787.
- 803 Martinez JL, Baquero F. 2000. Mutation frequencies and antibiotic resistance. *Antimicrob Agents*  
804 *Chemother* **44**:1771–1777. doi:10.1128/aac.44.7.1771-1777.2000
- 805 Meouche IE, Dunlop MJ. 2018. Heterogeneity in efflux pump expression predisposes antibiotic-  
806 resistant cells to mutation. *Science* **362**:686–690. doi:10.1126/science.aar7981
- 807 Merker M, Tueffers L, Vallier M, Groth EE, Sonnenkalb L, Unterweger D, Baines JF, Niemann S,  
808 Schulenburg H. 2020. Evolutionary Approaches to Combat Antibiotic Resistance:  
809 Opportunities and Challenges for Precision Medicine. *Front Immunol* **11**.  
810 doi:10.3389/fimmu.2020.01938
- 811 Mitchell A, Pilpel Y. 2011. A mathematical model for adaptive prediction of environmental changes  
812 by microorganisms. *Proc Natl Acad Sci* **108**:7271–7276. doi:10.1073/pnas.1019754108
- 813 Mitchell A, Romano GH, Groisman B, Yona A, Dekel E, Kupiec M, Dahan O, Pilpel Y. 2009. Adaptive  
814 prediction of environmental changes by microorganisms. *Nature* **460**:220–224.  
815 doi:10.1038/nature08112
- 816 Mushtaq S, Ge Y, Livermore DM. 2004. Doripenem versus *Pseudomonas aeruginosa* In Vitro: Activity  
817 against Characterized Isolates, Mutants, and Transconjugants and Resistance Selection  
818 Potential. *Antimicrob Agents Chemother* **48**:3086–3092. doi:10.1128/AAC.48.8.3086-  
819 3092.2004
- 820 Neu HC, Scully BE. 1984. Activity of Cefsulodin and Other Agents Against *Pseudomonas aeruginosa*.  
821 *Rev Infect Dis* **6**:S667–S677. doi:10.1093/clinids/6.Supplement\_3.S667
- 822 Nichol D, Rutter J, Bryant C, Hujer AM, Lek S, Adams MD, Jeavons P, Anderson ARA, Bonomo RA,  
823 Scott JG. 2019. Antibiotic collateral sensitivity is contingent on the repeatability of evolution.  
824 *Nat Commun* **10**:334. doi:10.1038/s41467-018-08098-6
- 825 Nyerges A, Tomašič T, Durcik M, Revesz T, Szili P, Draskovits G, Bogar F, Skok Ž, Zidar N, Ilaš J, Zega A,  
826 Kikelj D, Daruka L, Kintses B, Vasarhelyi B, Foldesi I, Kata D, Welin M, Kimbung R, Focht D,  
827 Mašič LP, Pal C. 2020. Rational design of balanced dual-targeting antibiotics with limited  
828 resistance. *PLOS Biol* **18**:e3000819. doi:10.1371/journal.pbio.3000819
- 829 Oliver A, Levin BR, Juan C, Baquero F, Blázquez J. 2004. Hypermutation and the Preexistence of  
830 Antibiotic-Resistant *Pseudomonas aeruginosa* Mutants: Implications for Susceptibility Testing  
831 and Treatment of Chronic Infections. *Antimicrob Agents Chemother* **48**:4226–4233.  
832 doi:10.1128/AAC.48.11.4226-4233.2004
- 833 Papp-Wallace KM, Endimiani A, Taracila MA, Bonomo RA. 2011. Carbapenems: Past, Present, and  
834 Future. *Antimicrob Agents Chemother* **55**:4943–4960. doi:10.1128/AAC.00296-11

- 835 Pena-Miller R, Laehnemann D, Jansen G, Fuentes-Hernandez A, Rosenstiel P, Schulenburg H,  
836 Beardmore R. 2013. When the Most Potent Combination of Antibiotics Selects for the  
837 Greatest Bacterial Load: The Smile-Frown Transition. *PLOS Biol* **11**:e1001540.  
838 doi:10.1371/journal.pbio.1001540
- 839 Poplin R, Ruano-Rubio V, DePristo MA, Fennell TJ, Carneiro MO, Auwera GAV der, Kling DE, Gauthier  
840 LD, Levy-Moonshine A, Roazen D, Shakir K, Thibault J, Chandran S, Whelan C, Lek M, Gabriel  
841 S, Daly MJ, Neale B, MacArthur DG, Banks E. 2018. Scaling accurate genetic variant discovery  
842 to tens of thousands of samples. *bioRxiv* 201178. doi:10.1101/201178
- 843 R Core Team (2020). R: A language and environment for statistical computing. R Foundation for  
844 Statistical Computing, Vienna, Austria. URL <https://www.R-project.org/>. Rahme C, Butterfield  
845 JM, Nicasio AM, Lodise TP. 2014. Dual beta-lactam therapy for serious Gram-negative  
846 infections: is it time to revisit? *Diagn Microbiol Infect Dis* **80**:239–259.  
847 doi:10.1016/j.diagmicrobio.2014.07.007
- 848 Rahme LG, Stevens, EJ, Wolfort, SF, Shao J, Tompkins, RG, Ausubel FM. 1995. Common virulence  
849 factors for bacterial pathogenicity in plants and animals. *Science* **268**:1899–1902.  
850 doi:10.1126/science.7604262
- 851 Ritz C, Baty F, Streibig JC, Gerhard D. 2015. Dose-Response Analysis Using R. *PLOS ONE* **10**:e0146021.  
852 doi:10.1371/journal.pone.0146021
- 853 Rodríguez-Tebar A, Rojo F, Dámaso D, Vázquez D. 1982. Carbenicillin resistance of *Pseudomonas*  
854 *aeruginosa*. *Antimicrob Agents Chemother* **22**:255–261. doi:10.1128/AAC.22.2.255
- 855 Rodríguez-Tebár A, Rojo F, Montilla JC, Vázquez D. 1982. Interaction of  $\beta$ -lactam antibiotics with  
856 penicillin-binding proteins from *Pseudomonas aeruginosa*. *FEMS Microbiol Lett* **14**:295–298.  
857 doi:<https://doi.org/10.1111/j.1574-6968.1982.tb00016.x>
- 858 Roemhild R, Barbosa C, Beardmore RE, Jansen G, Schulenburg H. 2015. Temporal variation in  
859 antibiotic environments slows down resistance evolution in pathogenic *Pseudomonas*  
860 *aeruginosa*. *Evol Appl* **8**:945–955. doi:<https://doi.org/10.1111/eva.12330>
- 861 Roemhild R, Gokhale CS, Dirksen P, Blake C, Rosenstiel P, Traulsen A, Andersson DI, Schulenburg H.  
862 2018. Cellular hysteresis as a principle to maximize the efficacy of antibiotic therapy. *Proc*  
863 *Natl Acad Sci* **115**:9767–9772. doi:10.1073/pnas.1810004115
- 864 Roemhild R, Schulenburg H. 2019. Evolutionary ecology meets the antibiotic crisis: Can we control  
865 pathogen adaptation through sequential therapy? *Evol Med Public Health* **2019**:37–45.  
866 doi:10.1093/emph/eoz008
- 867 Rosenkilde CEH, Munck C, Porse A, Linkevicius M, Andersson DI, Sommer MOA. 2019. Collateral  
868 sensitivity constrains resistance evolution of the CTX-M-15  $\beta$ -lactamase. *Nat Commun*  
869 **10**:618. doi:10.1038/s41467-019-08529-y
- 870 Ross-Gillespie A, Kümmerli R. 2014. ‘Evolution-Proofing’ Antibacterials. *Evol Med Public Health*  
871 **2014**:134–135. doi:10.1093/emph/eou020
- 872 Sakyo S, Tomita H, Tanimoto K, Fujimoto S, Ike Y. 2006. Potency of Carbapenems for the Prevention  
873 of Carbapenem-Resistant Mutants of *Pseudomonas aeruginosa*: The High Potency of a New  
874 Carbapenem Doripenem. *J Antibiot (Tokyo)* **59**:220–228. doi:10.1038/ja.2006.31
- 875 Sanz-García F, Hernando-Amado S, Martínez JL. 2018. Mutation-Driven Evolution of *Pseudomonas*  
876 *aeruginosa* in the Presence of either Ceftazidime or Ceftazidime-Avibactam. *Antimicrob*  
877 *Agents Chemother* **62**. doi:10.1128/AAC.01379-18
- 878 Schafer J, Goff D, Mangino J. 2009. Doripenem: A New Addition to the Carbapenem Class of  
879 Antimicrobials. *Recent Patents Anti-Infect Drug Disc* **4**:18–28.  
880 doi:10.2174/157489109787236283
- 881 Sobel ML, Hocquet D, Cao L, Plesiat P, Poole K. 2005. Mutations in PA3574 (nalD) Lead to Increased  
882 MexAB-OprM Expression and Multidrug Resistance in Laboratory and Clinical Isolates of  
883 *Pseudomonas aeruginosa*. *Antimicrob Agents Chemother* **49**:1782–1786.  
884 doi:10.1128/AAC.49.5.1782-1786.2005

- 885 Shyu WC, Nightingale CH, Quintiliani R. 1987. Pseudomonas peritonitis in neutropenic rats treated  
886 with amikacin, ceftazidime and ticarcillin, alone and in combination. *Journal of Antimicrobial*  
887 *Chemotherapy* (1987) **19**, 807-8
- 888 Szybalski W, Bryson V. 1952. Genetic studies on microbial cross resistance to toxic agents I. . *J*  
889 *Bacteriol* **64**:489–499.
- 890 Tanimoto K, Tomita H, Fujimoto S, Okuzumi K, Ike Y. 2008. Fluoroquinolone Enhances the Mutation  
891 Frequency for Meropenem-Selected Carbapenem Resistance in Pseudomonas aeruginosa,  
892 but Use of the High-Potency Drug Doripenem Inhibits Mutant Formation. *Antimicrob Agents*  
893 *Chemother* **52**:3795–3800. doi:10.1128/AAC.00464-08
- 894 Traub WH, Raymond EA. 1970. Susceptibility of Pseudomonas aeruginosa to Carbenicillin. *Appl*  
895 *Microbiol* **20**:630–632.
- 896 Tueffers L, Barbosa C, Bobis I, Schubert S, Höppner M, Rühlemann M, Franke A, Rosenstiel P,  
897 Friedrichs A, Krenz-Weinreich A, Fickenscher H, Bewig B, Schreiber S, Schulenburg H. 2019.  
898 Pseudomonas aeruginosa populations in the cystic fibrosis lung lose susceptibility to newly  
899 applied  $\beta$ -lactams within 3 days. *J Antimicrob Chemother* **74**:2916–2925.  
900 doi:10.1093/jac/dkz297
- 901 von der Schulenburg JHG, Hancock JM, Pagnamenta A, Sloggett JJ, Majerus MEN, Hurst GDD. 2001.  
902 Extreme Length and Length Variation in the First Ribosomal Internal Transcribed Spacer of  
903 Ladybird Beetles (Coleoptera: Coccinellidae). *Mol Biol Evol* **18**:648–660.  
904 doi:10.1093/oxfordjournals.molbev.a003845
- 905 Walsh C. 2003. Antibiotics: Actions, Origins, Resistance. Washington, D.C.: Asm Pr.
- 906 Woods RJ, Read AF. 2015. Clinical management of resistance evolution in a bacterial infection: A case  
907 study. *Evol Med Public Health* **2015**:281–288. doi:10.1093/emph/eov025
- 908 Wright DB. 1986. Cefsulodin. *Drug Intell Clin Pharm* **20**:845–849. doi:10.1177/106002808602001104
- 909 Yen P, Papin JA. 2017. History of antibiotic adaptation influences microbial evolutionary dynamics  
910 during subsequent treatment. *PLOS Biol* **15**:e2001586. doi:10.1371/journal.pbio.2001586
- 911 Yoshida M, Reyes SG, Tsuda S, Horinouchi T, Furusawa C, Cronin L. 2017. Time-programmable drug  
912 dosing allows the manipulation, suppression and reversal of antibiotic drug resistance in  
913 vitro. *Nat Commun* **8**:15589. doi:10.1038/ncomms15589
- 914 Zapun A, Contreras-Martel C, Vernet T. 2008. Penicillin-binding proteins and  $\beta$ -lactam resistance.  
915 *FEMS Microbiol Rev* **32**:361–385. doi:10.1111/j.1574-6976.2007.00095.x
- 916 Zheng Q. 2017. rSalvador: An R Package for the Fluctuation Experiment. *G3 GenesGenomesGenetics*  
917 **7**:3849–3856. doi:10.1534/g3.117.300120
- 918 Zhou S, Barbosa C, Woods RJ. 2020. Why is preventing antibiotic resistance so hard? Analysis of failed  
919 resistance management. *Evol Med Public Health* **2020**:102–108. doi:10.1093/emph/eoaa020
- 920 Zimmermann W. 1980. Penetration of beta-lactam antibiotics into their target enzymes in  
921 Pseudomonas aeruginosa: comparison of a highly sensitive mutant with its parent strain.  
922 *Antimicrob Agents Chemother* **18**:94–100. doi:10.1128/AAC.18.1.94  
923

924 **Legends for Figures**

925

926 **Figure 1. Probability of evolutionary rescue depends on drug triplets and treatment type. (A)** The  
927 evaluated antibiotic combinations comprise different types of antibiotic targets. Fluoroquinolone  
928 antibiotics (FQ) target DNA gyrase, aminoglycosides (AG) inhibit translation, and  $\beta$ -lactams (BL)  
929 inhibit cell-wall synthesis. **(B)** The evaluated treatment protocols test the effects of switching rate,  
930 and temporal regularity. **(C)** A fraction of lineages is eradicated by the sub-lethal dosage sequential  
931 treatments. Lineage extinction is high for combinations of cell-wall targeting  $\beta$ -lactams. **(D)** Variation  
932 in extinction for the  $\beta$ -lactam combinations by treatment type (n=3-6 protocols per treatment type).  
933 **(E)** The distribution of evolutionary trajectories for Exp. 3 with CAR-DOR-CEF shows that the majority  
934 of extinction events occur within the first 12 serial transfers (n=180 lineages). Growth of evolving  
935 lineages is quantified relative to untreated reference populations using the relative area under the  
936 growth curve (AUC). AZL: azlocillin, CAR: carbenicillin, CEF: cefsulodin, CEZ: ceftazidime, CIP:  
937 ciprofloxacin, DOR: doripenem, GEN: gentamicin, STR: streptomycin, TIC: ticarcillin. The following  
938 supplementary material is available for Figure 1: Figure 1-figure supplement 1, Figure 1-source data  
939 1, Figure 1-figure supplement 1-Source data 1, Supplementary File 1A.

940

941 **Figure 2. Resistance to doripenem is constrained in the CAR-CEF-DOR triple  $\beta$ -lactam experiment.**  
942 **(A)** Rapid adaptive increase of biomass yields relative to the untreated reference populations (mean  
943  $\pm$  CI95; n=3-6 protocols per treatment type and 12 biological replicates per sequence; extinct lineages  
944 excluded). Vertical dotted lines separate the three growth phases. Evolved changes in the  
945 susceptibility to the treatment antibiotics CAR, DOR, and CEF and the non-treatment antibiotics CIP  
946 and GEN after transfer 12 **(B)** or transfer 48 **(C)**, evaluated with 20 isolates each for the 16  
947 representative adapting populations at each time point. Mono 1 is monotherapy with CAR, mono 2 is  
948 monotherapy with DOR, and mono 3 is monotherapy with CEF. The evolution of resistance and  
949 hypersensitivity are indicated by red and blue colour, respectively, given for the considered isolates  
950 as horizontal lines (total of 640 isolates), sorted according to evolution treatment (main rows in the  
951 figures) and tested antibiotics (main columns; antibiotics given at the bottom). Pie charts on the right  
952 show phenotypic within-population diversity, where different colours indicate subpopulations  
953 inferred from hierarchical clustering of resistance phenotypes. The following supplementary material  
954 is available for Figure 2: Figure 2-figure supplement 1, Figure 2-Figure Supplement 2, Figure 2-figure  
955 supplement 3, Figure 2-figure supplement 4, Figure 2-figure supplement 5, Figure 2-source data 1,  
956 Figure 2-figure supplement 1-source data 1, Figure 2-figure supplement 2-source data 1, Figure 2-  
957 figure supplement 3-source data 1, Figure 2-figure supplement 5-source data 1, Supplementary File  
958 1B-1F.

959

960 **Figure 3. Negative hysteresis is common among the tested  $\beta$ -lactam antibiotics. (A)** Hysteresis  
961 effects were measured using the previously established experimental approach (see methods). **(B)**  
962 Bacterial counts were plotted over time after the pretreatment to obtain time-kill curves (mean  $\pm$   
963 sem, n=3). Level of hysteresis was quantified as the difference between the antibiotic switch and the  
964 only main curves. Negative values indicate negative hysteresis and positive values indicate positive  
965 hysteresis **(C)** Heatmap of hysteresis levels between all 9 combinations of the three  $\beta$ -lactams. DOR

966 and CAR show asymmetric bidirectional negative hysteresis. Negative hysteresis is also observed in  
967 switches from CEF to CEF and CAR to CEF. Weak positive hysteresis is found for the switch from CEF  
968 to CAR. The following supplementary material is available for Figure 3: Figure 3-figure supplement 1,  
969 Figure 3-figure supplement 2, Figure 3-source data 1, Figure 3-figure supplement 1-source data 1.

970

971 **Figure 4. Doripenem has the lowest rates of direct and indirect resistance. (A)** Schematic of the  
972 experimental protocol to determine spontaneous rates of resistance on each of the three  $\beta$ -lactams  
973 and the resulting collateral landscape. Briefly, an overnight culture was taken and split into 30  
974 parallel cultures where bacteria were allowed to divide in the absence of an antibiotic and any other  
975 constraint. Spontaneous resistant mutants were selected on MIC plates and restreaked to ensure  
976 genetic resistance. These mutants were then patched on MIC plates of the other two  $\beta$ -lactams to  
977 test for cross-resistance. **(B)** Comparison of rates of spontaneous resistance on the three  $\beta$ -lactams,  
978 on a Log10 scale. Error bars depict CI95. All comparisons were found to be significantly different from  
979 each other (Likelihood Ratio Test; CAR vs CEF  $p < 0.0001$ , CAR vs DOR  $p < 0.0001$  and DOR vs CEF  
980  $p < 0.01$ ). **(C)** Landscape of collateral effects between the three  $\beta$ -lactams. Fraction of cross-resistant  
981 mutants per antibiotic combination is plotted. DOR has the least cases of cross-resistance of the  
982 three. A total of 60 mutants per antibiotic were used for collateral effect testing. The following  
983 supplementary material is available for Figure 4: Figure 4-source data 1, Supplementary File 1G-1I.

984

985 **Figure 5. Bacterial extinction is correlated to switching rate, spontaneous rate of resistance and**  
986 **spontaneous cross-resistance. (A)** Variation in experimental parameters, potential biological  
987 predictors, and the measured traits up to transfer 12. The experimental parameters include switching  
988 rate, and regularity of change (high irregularity in dark). Potential biological predictors are cumulative  
989 levels of hysteresis (dark indicates protective effects), cumulative probabilities of spontaneous  
990 resistance (Spont. res., dark indicates higher probability), and cumulative level of collateral effects  
991 (Cross-res., dark indicates high fraction of cross-resistance). The evolutionary response was  
992 measured for population survival (max=12), adaptation rate (Adapt. rate,  $n \leq 12$ , extinct lineages  
993 excluded), evolved multidrug resistance to treatment antibiotics CAR, DOR, and CEF (MDR,  $n=16$ ). **(B)**  
994 Variation in extinction was best explained by collateral effects between the antibiotics (for illustrative  
995 purposes, the red line depicts linear regression and  $\rho_s$  the Spearman's rank correlation coefficient).  
996 The following supplementary material is available for Figure 5: Figure 5-figure supplement 1, Figure  
997 5-source data 1, Supplementary File 1J-1O.

998



999 **Legends for Figure Supplements**

1000

1001 **Figure 1-figure supplement 1.** Antibiotic dose-response curves for PA14 (mean  $\pm$  s.d.; n=6 biological  
1002 replicates). Red text and points indicate IC75 inhibitory concentrations as applied in the evolution  
1003 experiments. Grey line indicates Nelder-Mead dose-response model (R package *drc*). The source data  
1004 is provided in Figure 1-figure supplement 1-source data 1.

1005

1006 **Figure 2-figure supplement 1.** Growth dynamics in fast sequential protocols. (A) Evolutionary growth  
1007 improvements for fast protocol #6 (mean of the 7 surviving lineages). Relative growth increased to  
1008 the antibiotics at different rates, demonstrating the consecutive evolution of resistance, and thus  
1009 coexistence of genetic subpopulations. The resulting clonal interference may explain the drop of  
1010 growth on CEF around transfer 50, and the subsequent growth oscillations during CEF. (B) Mean  
1011 difference of growth during exposures to particular antibiotics in fast sequential protocols #5-7,  
1012 compared to growth in monotherapies after the same number of exposures to that drug. X-axis  
1013 denotes exposures to a particular antibiotic, and thus goes to  $96/3 = 32$ . Multidrug exposure  
1014 accelerated adaptation compared to monotherapy against CAR and CEF, but slowed down  
1015 adaptation against DOR. The source data is provided in Figure 2-figure supplement 1-source data 1

1016

1017 **Figure 2-figure supplement 2.** Dose-response curve distributions for Exp. 3 with CAR-DOR-CEF,  
1018 underlying Fig 2B and Fig 2C. Grey lines show data from evolved isolates, magenta lines show  
1019 repeated measurements of the PA14 ancestor. The source data is provided in Figure 2-figure  
1020 supplement 2-source data 1.

1021

1022 **Figure 2-figure supplement 3.** Relation between the resistance values and the fold-change of the  
1023 minimal inhibitory concentrations (MIC) approximated by IC90. The resistance values are depicted in  
1024 Figures 2B and 2C. The boxes show interquartile range (25th to 75th percentile), the thick line  
1025 indicates the median. Whiskers cover data range but are capped at maximum 1.5x the interquartile  
1026 range. The source data is provided in Figure 2-figure supplement 3-source data 1.

1027

1028 **Figure 2-figure supplement 4.** Change of population antibiotic resistance between transfer 12  
1029 (indicated in grey) and transfer 48 (indicated in red). The resistance values are depicted in Figures 2B  
1030 and 2C. The boxes show interquartile range (25th to 75th percentile), the thick line indicates the  
1031 median. Whiskers cover data range but are capped at maximum 1.5x the interquartile range.  
1032 Statistical difference between time points was assessed using Wilcoxon Rank Sum test as described  
1033 in Supplementary File 1F. A blue shading of the background indicates significant decrease of  
1034 resistance and a yellow background shading indicates a significant increase of resistance. P-values  
1035 were adjusted by Bonferroni correction. The figure is a different representation of the data shown in  
1036 the heatmaps of Figure 2B and 2C. The source data is accordingly provided in Figure 2-source data 1.  
1037 The results of the statistical analysis are provided in Supplementary File 1F.

1038

1039 **Figure 2-figure supplement 5.** Population multidrug resistance after (A) transfer 12 and (B) transfer  
1040 48. The left column indicates the sum of resistance scores for the  $\beta$ -lactam antibiotics CAR, DOR, and  
1041 CEF, which were used for the evolution experiment. The right column indicates the sum of collateral  
1042 resistance to the antibiotics CIP and GEN, which were not used in the evolution experiment. Clones  
1043 are depicted in the same order as in Figures 2B and 2C, and on the same colour scale. The source  
1044 data is provided in Figure 2-figure supplement 5-source data 1.

1045

1046 **Figure 3-figure supplement 1.** Time-kill curves of hysteresis experiments for the combinations not  
1047 presented in Figure 3 (mean  $\pm$  sem, n=3). The source data is provided in Figure 3-figure supplement  
1048 1-source data 1.

1049

1050 **Figure 3-figure supplement 2.** Hysteresis effects quantified as area under curve (AUC) difference  
1051 between the 'only main' and 'antibiotic switch' curves from the time-kill dynamics. This figure is a  
1052 different representation of the same data shown in the heatmap of Figure 3C. The source data for  
1053 this figure is accordingly provided in Figure 3-source data 1.

1054

1055 **Figure 5-figure supplement 1.** Correlation of switching rate with cumulative levels of collateral  
1056 effects.



1057 **Source Data Files**

1058

1059 **Figure 1-source data 1.** Source data for the panels of Figure 1.

1060

1061 **Figure 1-figure supplement 1-source data 1.** Source data for Figure 1-figure supplement 1.

1062

1063 **Figure 2-source data 1.** Source data for the panels of Figure 2.

1064

1065 **Figure 2-figure supplement 1-source data 1.** Source data for Figure 2-figure supplement 1.

1066

1067 **Figure 2-figure supplement 2-source data 1.** Source data for Figure 2-figure supplement 2.

1068

1069 **Figure 2-figure supplement 3-source data 1.** Source data for Figure 2-figure supplement 3.

1070

1071 **Figure 2-figure supplement 5-source data 1.** Source data for Figure 2-figure supplement 5.

1072

1073 **Figure 3-source data 1.** Source data for the panels of Figure 3.

1074

1075 **Figure 3-figure supplement 1-source data 1.** Source data for Figure 3-figure supplement 1.

1076

1077 **Figure 4-source data 1.** Source data for Figure 4.

1078

1079 **Figure 5-source data 1.** Source data for Figure 5.

1080

1081 **Table 1-source data 1.** Source data for the summary of the genome sequencing analysis shown in  
1082 Table 1.

1083

1084

1085

1086 **Supplementary File.** Supplementary File 1A-1O containing tables with information on antibiotics  
1087 used and summaries of the statistical analyses.

1088

**A** --- Exp. 1 Roemhild et al. 2018  
 — Exp. 2 this study  
 — Exp. 3 this study  
 — Exp. 4 this study

DNA gyrase, FQ

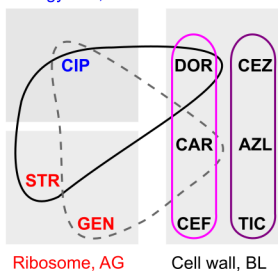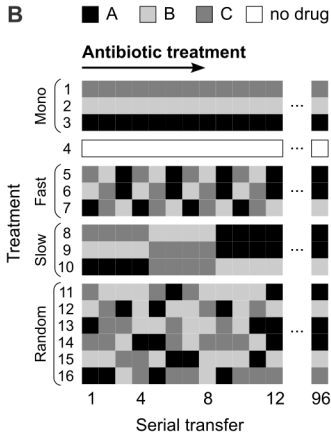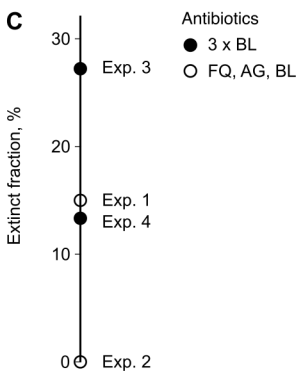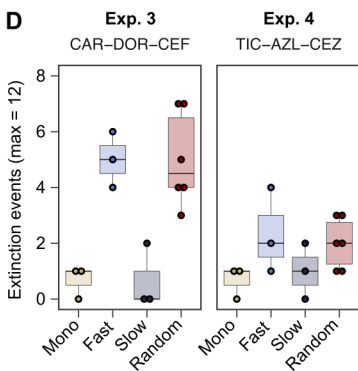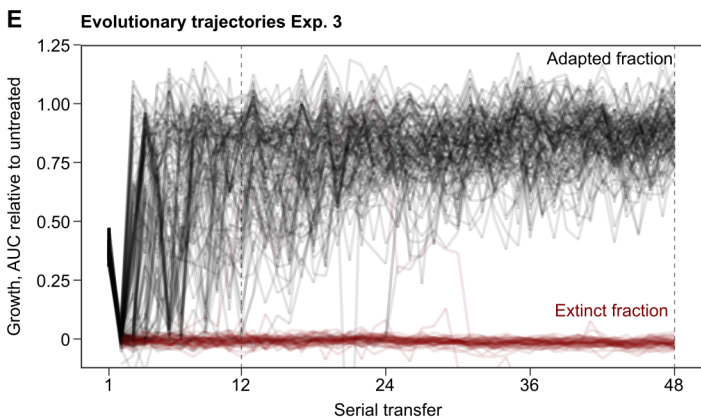

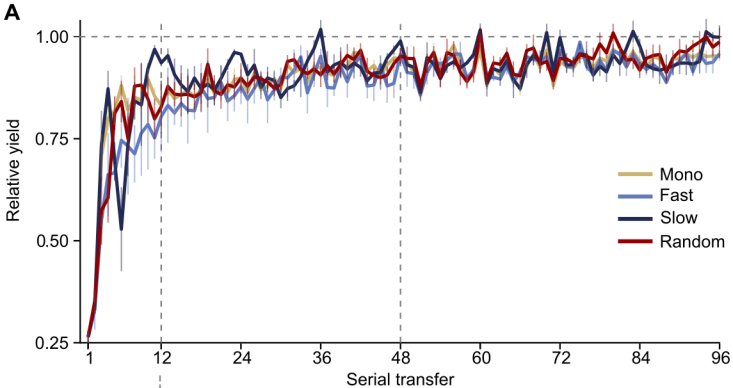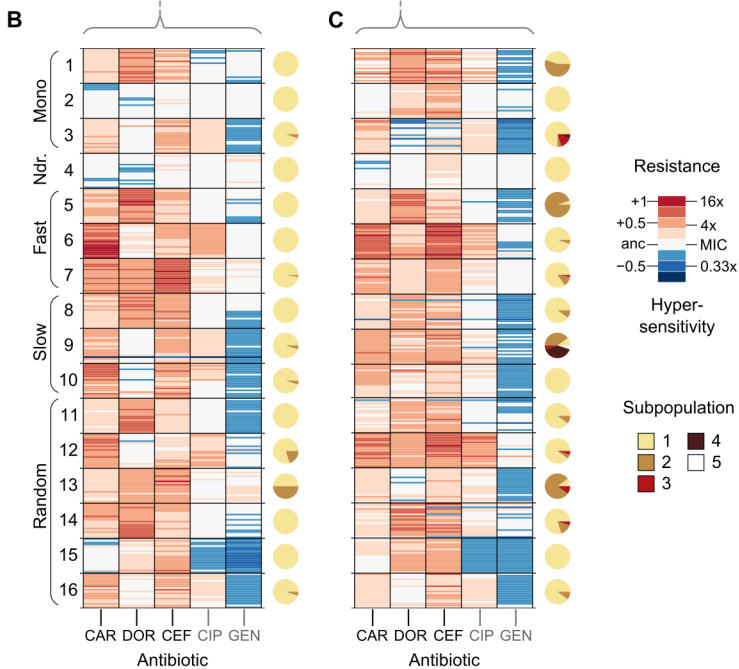

A

## Experimental design

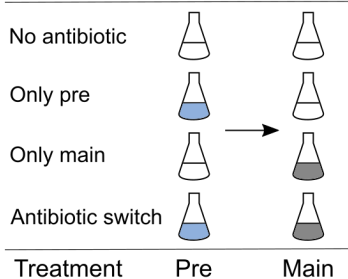

B

## Antibiotic-induced hysteresis

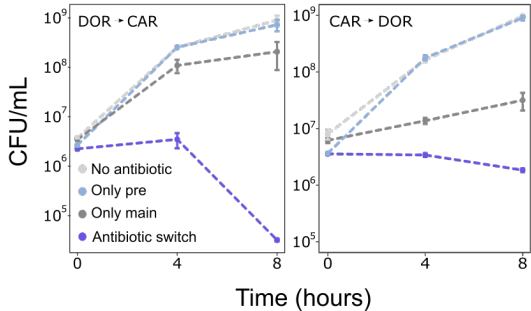

C

## Hysteresis landscape

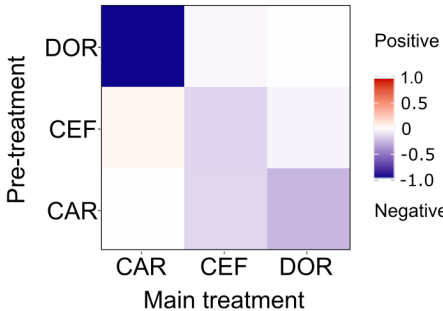

**A****Experimental design**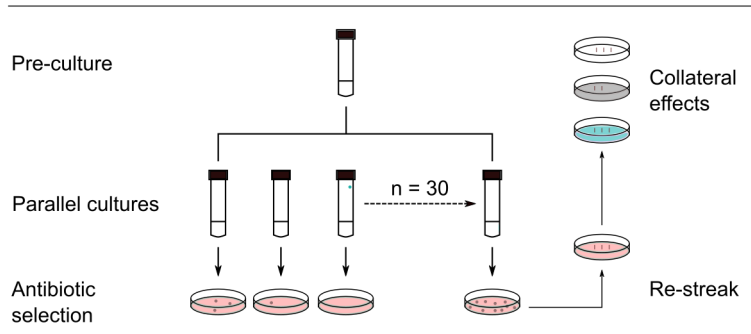**B****Direct resistance**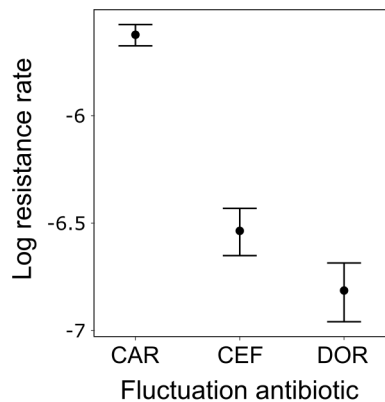**C****Collateral effects**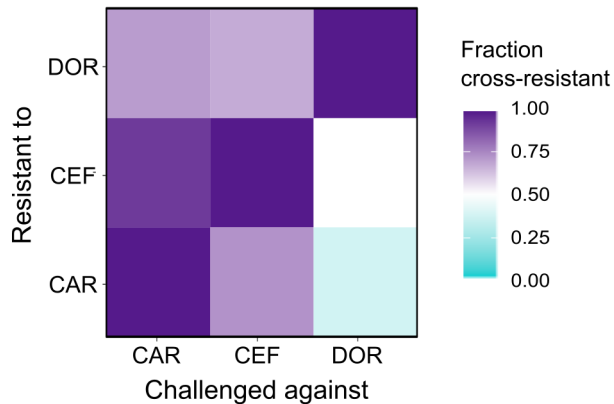

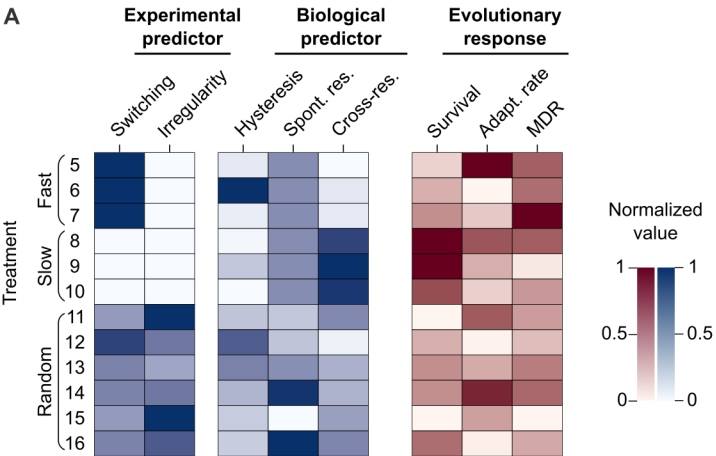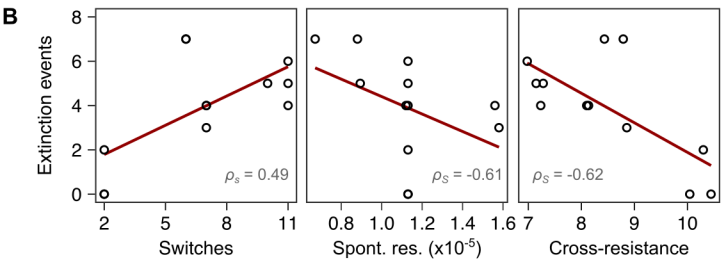



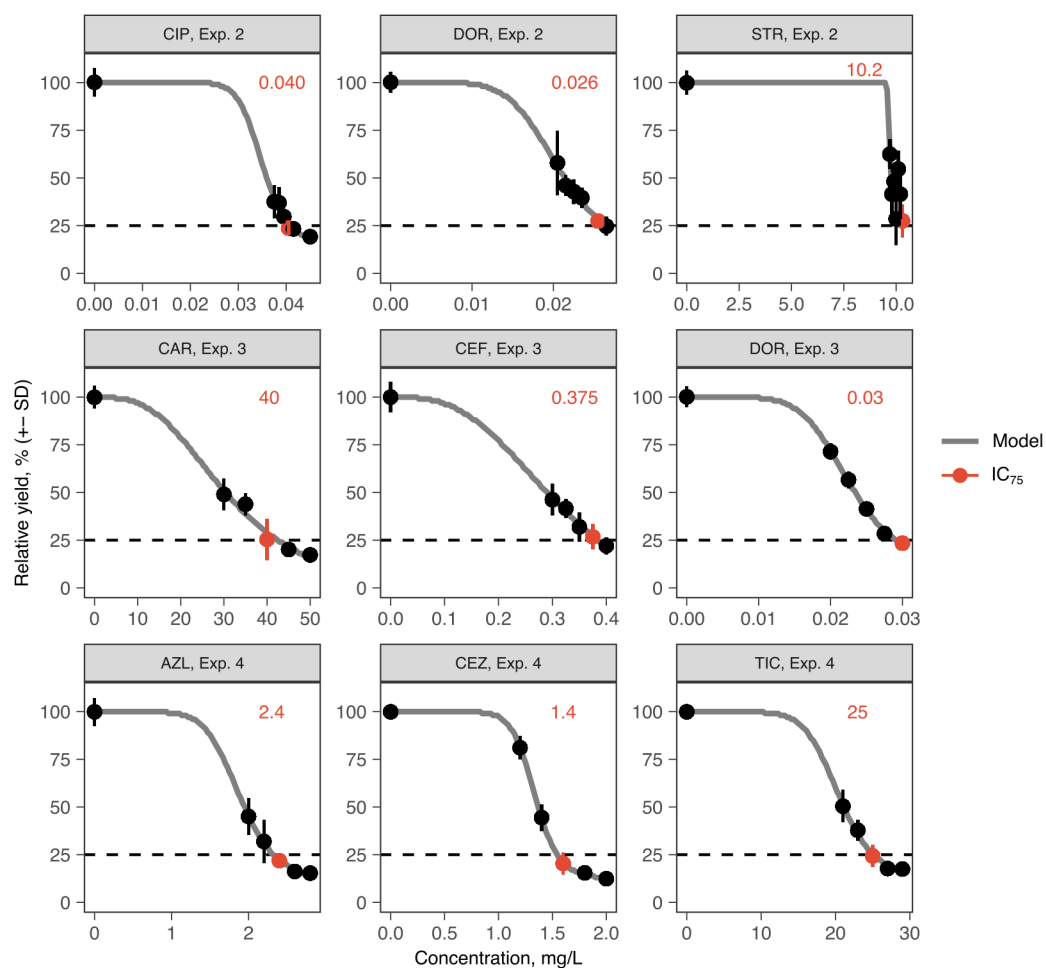

**A**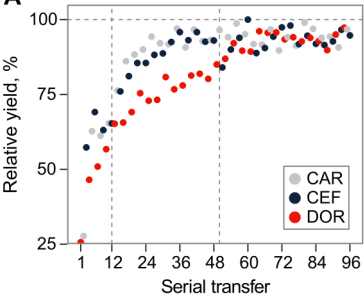**B**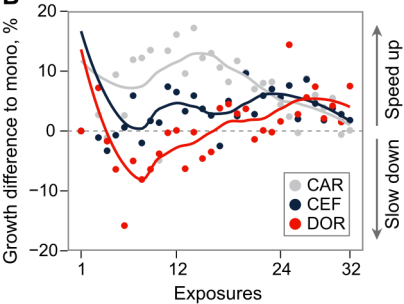

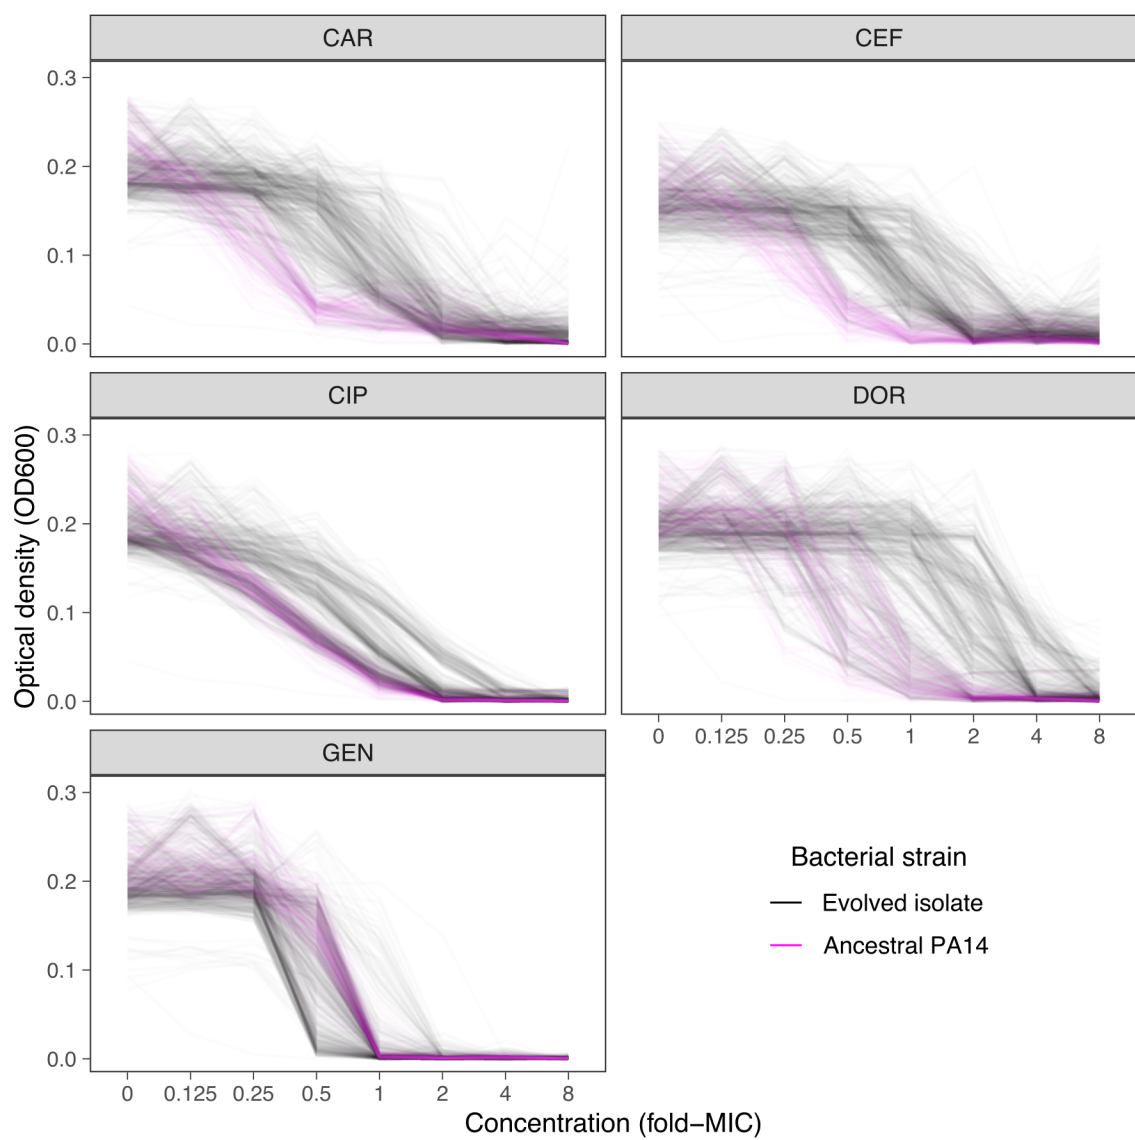

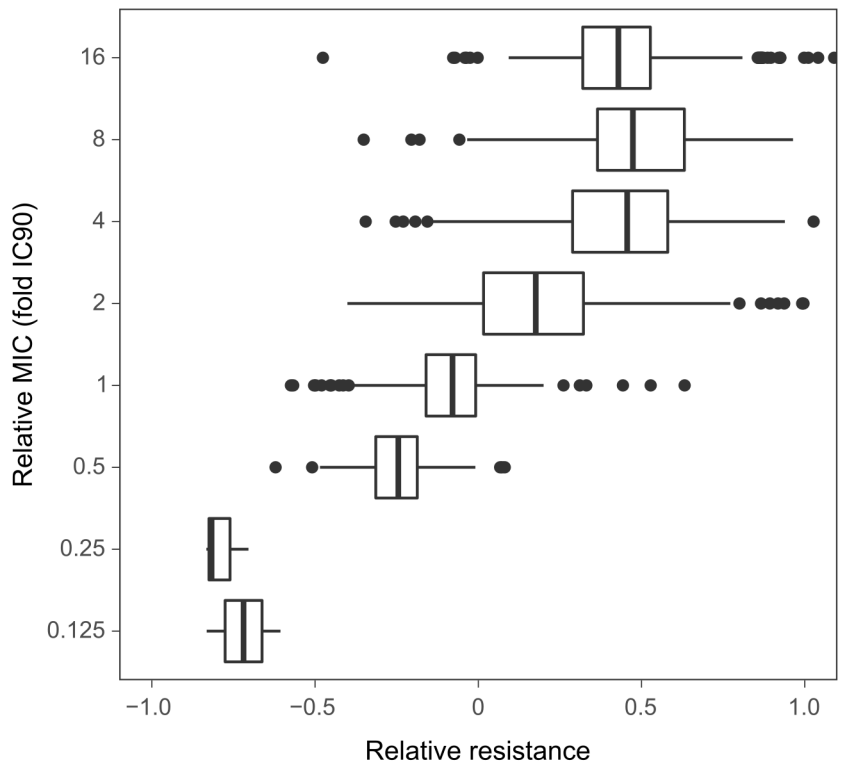

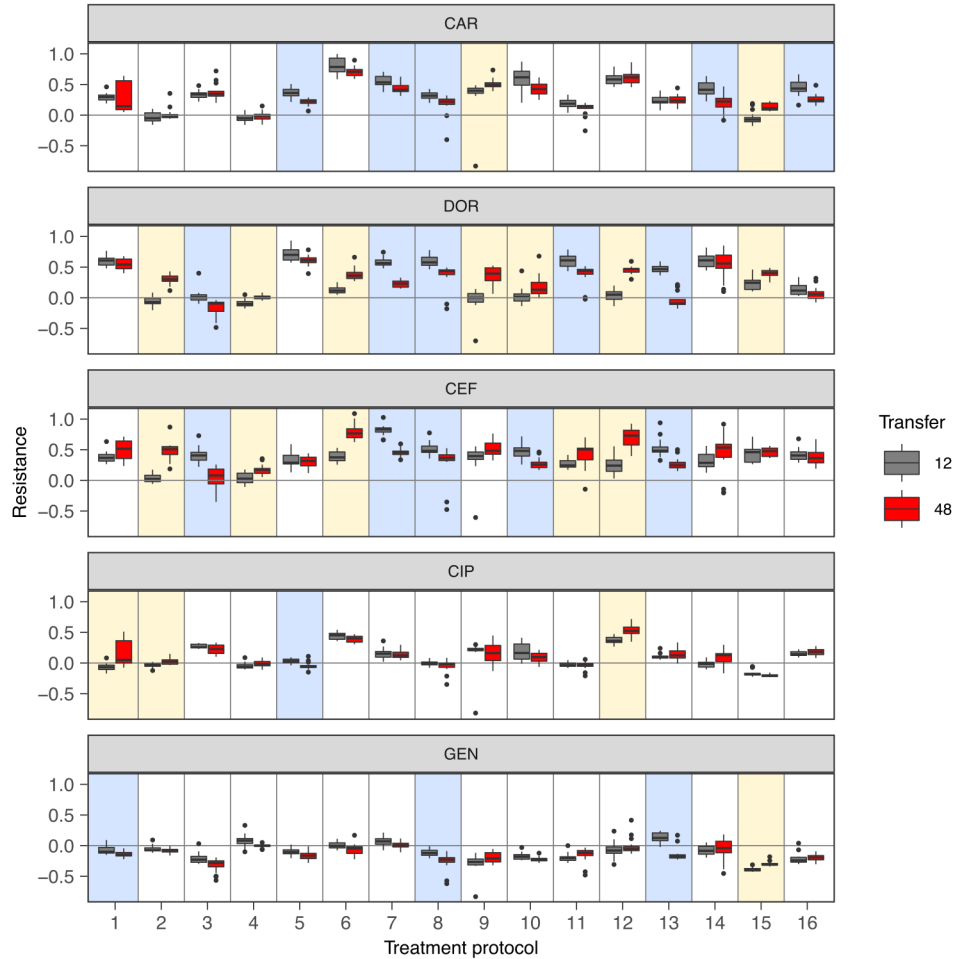

**A** Serial transfer 12**B** Serial transfer 48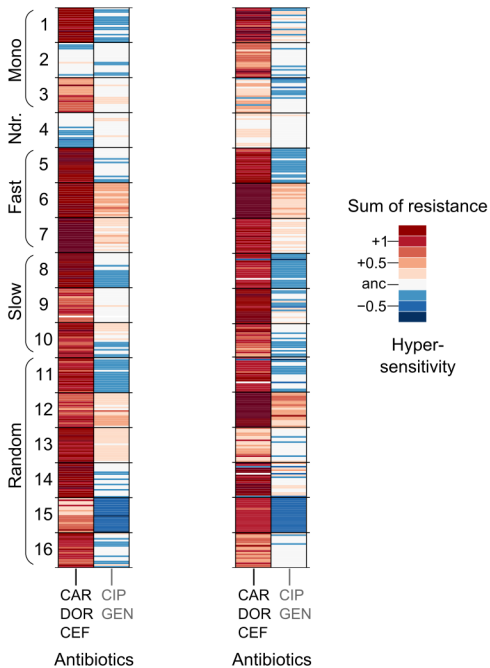

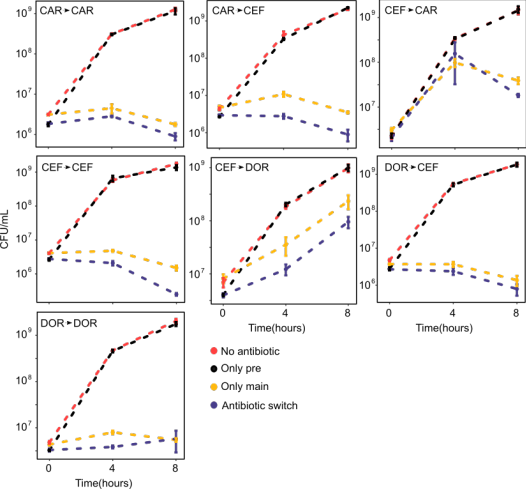



Delta AUC (log)

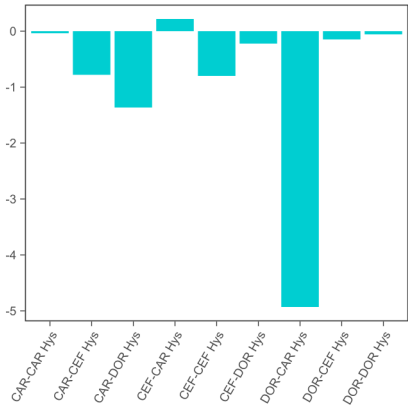

Antibiotic switch

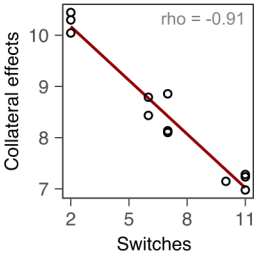

Source: https://www.biorxiv.org/content/10.1101/2021.07.20.453050v1.full.pdf
